# Supplementary material for: Kribbellichelins A and B, Two New Antibiotics from Kribbella sp. CA-293567 with Activity against Several Human Pathogens
Source: MDPI journal article supplement (doi:10.3390/molecules27196355), 2022-09-26
Supplement: s1 [file s1]

## **Supplementary Materials**

### **Kribbellichelins A and B, Two New Antibiotics from *Kribbella* sp. CA-293567 with Activity against Several Human Pathogens**

**Jorge R. Virués-Segovia, Fernando Reyes, Sandra Ruíz, Jesús Martín, Ignacio Fernández-Pastor, Carlos Justicia, Mercedes de la Cruz, Caridad Díaz, Thomas A. Mackenzie, Olga Genilloud, Ignacio González and José R. Tormo \***

Fundación MEDINA, Av. Conocimiento 34, Health Sciences Technology Park, 18016 Granada, Spain

\* Correspondence: [ruben.tormo@medinaandalucia.es](mailto:ruben.tormo@medinaandalucia.es) (J.R.T.); Tel.: +34-958-993-965

**Table S1.** Taxonomical classification of the 108 actinomycetes strains isolated from the aerial part, roots and rhizosphere of the endemic plant *Limonium majus* across orders, families and genus. In bold is highlighted the taxonomical classification of the *Kribbella* strain studied in detail.

| <b>Tax Order</b>           | <b>Family</b>                | <b>Genus</b>             | <b>Number</b> | <b>Origin</b>                                           |
|----------------------------|------------------------------|--------------------------|---------------|---------------------------------------------------------|
| <i>Corynebacteriales</i>   | <i>Nocardiaceae</i>          | <i>Nocardia</i>          | 1             | Rhizosphere                                             |
| <i>Micrococcales</i>       | <i>Brevibacteriaceae</i>     | <i>Brevibacterium</i>    | 3             | Roots (n =1) and rhizosphere (n=2)                      |
|                            | <i>Microbacteriaceae</i>     | <i>Microbacterium</i>    | 2             | Roots and rhizosphere                                   |
|                            |                              | <i>Agrococcus</i>        | 2             | Rhizosphere                                             |
|                            |                              | <i>Curtobacterium</i>    | 1             | Roots                                                   |
|                            | <i>Micrococcaceae</i>        | <i>Kocuria</i>           | 2             | Aerial part                                             |
|                            |                              | <i>Micrococcus</i>       | 1             | Aerial part                                             |
|                            |                              | <i>Arthrobacter</i>      | 2             | Roots                                                   |
|                            |                              | <i>Pseudarthrobacter</i> | 1             | Rhizosphere                                             |
|                            | <i>Promicromonosporaceae</i> | <i>Promicromonospora</i> | 3             | Rhizosphere                                             |
|                            |                              | <i>Isoptericola</i>      | 1             | Rhizosphere                                             |
|                            | <i>Dermabacteraceae</i>      | <i>Brachybacterium</i>   | 1             | Rhizosphere                                             |
| <i>Micromonosporales</i>   | <i>Micromonosporaceae</i>    | <i>Micromonospora</i>    | 17            | Roots (n=3) and rhizosphere (n=10)                      |
|                            |                              | <i>Xiangella</i>         | 1             | Rhizosphere                                             |
| <i>Mycobacteriales</i>     | <i>Mycobacteriaceae</i>      | <i>Mycolicibacterium</i> | 1             | Rhizosphere                                             |
| <i>Propionibacteriales</i> | <i>Nocardioidaceae</i>       | <i>Aeromicrobium</i>     | 1             | Rhizosphere                                             |
|                            |                              | <b><i>Kribbella</i></b>  | 2             | Rhizosphere                                             |
|                            |                              | <i>Nocardioides</i>      | 4             | Rhizosphere                                             |
|                            | <i>Propionibacteriaceae</i>  | <i>Friedmanniella</i>    | 1             | Roots                                                   |
| <i>Pseudonocardiales</i>   | <i>Pseudonocardiaceae</i>    | <i>Saccharopolyspora</i> | 1             | Roots                                                   |
|                            |                              | <i>Actinokineospora</i>  | 2             | Rhizosphere                                             |
| <i>Streptomycetales</i>    | <i>Streptomycetaceae</i>     | <i>Streptomyces</i>      | 47            | Aerial part (n=5), roots (n=7) and rhizosphere (n=35)   |
| <i>Streptosporangiales</i> | <i>Streptosporangiaceae</i>  | <i>Nonomuraea</i>        | 1             | Rhizosphere                                             |
| <i>Frankiales</i>          | <i>Geodermatophilaceae</i>   | <i>Modestobacter</i>     | 1             | Aerial part                                             |
| <i>Kineosporiales</i>      | <i>Kineosporiaceae</i>       | <i>Angustibacter</i>     | 1             | Aerial part                                             |
| <i>Incertae sedis</i>      |                              |                          | 8             | Roots (n=5) and rhizosphere (n=3)                       |
| <b>Total</b>               |                              |                          | 108           | Aerial part (n=10), roots (n=26) and rhizosphere (n=72) |

Table S2. Taxonomical classification of the 96 actinomycetes classified based on their ribosomal 16S rDNA. Individual GenBank accession numbers indicated.

| Strain Name | Accession Number | Phylum         | Class         | Order               | Family                | Genus             | Species       |
|-------------|------------------|----------------|---------------|---------------------|-----------------------|-------------------|---------------|
| CA-289638   | OP442265         | Actinomycetota | Actinomycetes | Streptomycetales    | Streptomycetaceae     | Streptomyces      | finlayi       |
| CA-289639   | OP442266         | Actinomycetota | Actinomycetes | Streptomycetales    | Streptomycetaceae     | Streptomyces      | chumphonensis |
| CA-289640   | OP442267         | Actinomycetota | Actinomycetes | Streptomycetales    | Streptomycetaceae     | Streptomyces      | bacillaris    |
| CA-289641   | OP442268         | Actinomycetota | Actinomycetes | Streptomycetales    | Streptomycetaceae     | Streptomyces      | bacillaris    |
| CA-289642   | OP442269         | Actinomycetota | Actinomycetes | Streptomycetales    | Streptomycetaceae     | Streptomyces      | specialis     |
| CA-290269   | OP442270         | Actinomycetota | Actinomycetes | Micromonosporales   | Micromonosporaceae    | Micromonospora    | vinacea       |
| CA-290270   | OP442271         | Actinomycetota | Actinomycetes | Micromonosporales   | Micromonosporaceae    | Xiangella         | phaseoli      |
| CA-290272   | OP442272         | Actinomycetota | Actinomycetes | Streptomycetales    | Streptomycetaceae     | Streptomyces      | cacaoi        |
| CA-290273   | OP442273         | Actinomycetota | Actinomycetes | Micromonosporales   | Micromonosporaceae    | Micromonospora    | vinacea       |
| CA-290274   | OP442274         | Actinomycetota | Actinomycetes | Streptomycetales    | Streptomycetaceae     | Streptomyces      | carpaticus    |
| CA-290275   | OP442275         | Actinomycetota | Actinomycetes | Streptomycetales    | Streptomycetaceae     | Streptomyces      | carpaticus    |
| CA-290555   | OP442276         | Actinomycetota | Actinomycetes | Pseudonocardiales   | Pseudonocardaceae     | Saccharopolyspora | gloriosae     |
| CA-290924   | OP442277         | Actinomycetota | Actinomycetes | Micromonosporales   | Micromonosporaceae    | Micromonospora    | vinacea       |
| CA-290925   | OP442278         | Actinomycetota | Actinomycetes | Streptomycetales    | Streptomycetaceae     | Streptomyces      | olivaceus     |
| CA-291033   | OP442279         | Actinomycetota | Actinomycetes | Streptomycetales    | Streptomycetaceae     | Streptomyces      | chumphonensis |
| CA-291038   | OP442280         | Actinomycetota | Actinomycetes | Streptomycetales    | Streptomycetaceae     | Streptomyces      | ambofaciens   |
| CA-291078   | OP442281         | Actinomycetota | Actinomycetes | Streptomycetales    | Streptomycetaceae     | Streptomyces      | harbinensis   |
| CA-293550   | OP442282         | Actinomycetota | Actinomycetes | Propionibacteriales | Kribbellaceae         | Kribbella         | deserti       |
| CA-293551   | OP442283         | Actinomycetota | Actinomycetes | Streptomycetales    | Streptomycetaceae     | Streptomyces      | pratensis     |
| CA-293552   | OP442284         | Actinomycetota | Actinomycetes | Micrococcales       | Promicromonosporaceae | Promicromonospora | alba          |
| CA-293553   | OP442285         | Actinomycetota | Actinomycetes | Streptomycetales    | Streptomycetaceae     | Streptomyces      | pratensis     |
| CA-293555   | OP442286         | Actinomycetota | Actinomycetes | Streptomycetales    | Streptomycetaceae     | Streptomyces      | galilaeus     |
| CA-293556   | OP442287         | Actinomycetota | Actinomycetes | Streptomycetales    | Streptomycetaceae     | Streptomyces      | pratensis     |
| CA-293557   | OP442288         | Actinomycetota | Actinomycetes | Streptomycetales    | Streptomycetaceae     | Streptomyces      | galilaeus     |
| CA-293558   | OP442289         | Actinomycetota | Actinomycetes | Streptomycetales    | Streptomycetaceae     | Streptomyces      | peucetius     |

|           |          |                |               |                     |                       |                   |               |
|-----------|----------|----------------|---------------|---------------------|-----------------------|-------------------|---------------|
| CA-293559 | OP442290 | Actinomycetota | Actinomycetes | Micromonosporales   | Micromonosporaceae    | Micromonospora    | saelicesensis |
| CA-293560 | OP442291 | Actinomycetota | Actinomycetes | Mycobacteriales     | Nocardiaceae          | Nocardia          | sungurluensis |
| CA-293561 | OP442292 | Actinomycetota | Actinomycetes | Micromonosporales   | Micromonosporaceae    | Micromonospora    | vinacea       |
| CA-293562 | OP442293 | Actinomycetota | Actinomycetes | Streptomyces        | Streptomyces          | Streptomyces      | cinereus      |
| CA-293563 | OP442294 | Actinomycetota | Actinomycetes | Streptomyces        | Streptomyces          | Streptomyces      | sparsus       |
| CA-293564 | OP442295 | Actinomycetota | Actinomycetes | Streptomyces        | Streptomyces          | Streptomyces      | cinereus      |
| CA-293565 | OP442296 | Actinomycetota | Actinomycetes | Streptomyces        | Streptomyces          | Streptomyces      | cinereus      |
| CA-293566 | OP442297 | Actinomycetota | Actinomycetes | Streptomyces        | Streptomyces          | Streptomyces      | cinereus      |
| CA-293567 | OP442298 | Actinomycetota | Actinomycetes | Propionibacteriales | Kribbellaceae         | Kribbella         | ginsengisoli  |
| CA-293568 | OP442299 | Actinomycetota | Actinomycetes | Streptomyces        | Streptomyces          | Streptomyces      | sparsus       |
| CA-293569 | OP442300 | Actinomycetota | Actinomycetes | Streptomyces        | Streptomyces          | Streptomyces      | ambofaciens   |
| CA-293570 | OP442301 | Actinomycetota | Actinomycetes | Micromonosporales   | Micromonosporaceae    | Micromonospora    | vinacea       |
| CA-293571 | OP442302 | Actinomycetota | Actinomycetes | Streptomyces        | Streptomyces          | Streptomyces      | fulvissimus   |
| CA-293572 | OP442303 | Actinomycetota | Actinomycetes | Streptomyces        | Streptomyces          | Streptomyces      | galilaeus     |
| CA-293573 | OP442304 | Actinomycetota | Actinomycetes | Streptomyces        | Streptomyces          | Streptomyces      | galilaeus     |
| CA-293574 | OP442305 | Actinomycetota | Actinomycetes | Micrococcales       | Promicromonosporaceae | Promicromonospora | alba          |
| CA-293575 | OP442306 | Actinomycetota | Actinomycetes | Streptomyces        | Streptomyces          | Streptomyces      | laurentii     |
| CA-293576 | OP442307 | Actinomycetota | Actinomycetes | Streptomyces        | Streptomyces          | Streptomyces      | sampsonii     |
| CA-293577 | OP442308 | Actinomycetota | Actinomycetes | Streptomyces        | Streptomyces          | Streptomyces      | pratensis     |
| CA-293579 | OP442309 | Actinomycetota | Actinomycetes | Streptomyces        | Streptomyces          | Streptomyces      | laurentii     |
| CA-293580 | OP442310 | Actinomycetota | Actinomycetes | Pseudonocardiales   | Pseudonocardiaceae    | Actinokineospora  | acnipugnans   |
| CA-293581 | OP442311 | Actinomycetota | Actinomycetes | Pseudonocardiales   | Pseudonocardiaceae    | Actinokineospora  | acnipugnans   |
| CA-293582 | OP442312 | Actinomycetota | Actinomycetes | Streptomyces        | Streptomyces          | Streptomyces      | pratensis     |
| CA-293583 | OP442313 | Actinomycetota | Actinomycetes | Streptomyces        | Streptomyces          | Streptomyces      | pratensis     |
| CA-293584 | OP442314 | Actinomycetota | Actinomycetes | Streptomyces        | Streptomyces          | Streptomyces      | sampsonii     |
| CA-293585 | OP442315 | Actinomycetota | Actinomycetes | Micromonosporales   | Micromonosporaceae    | Micromonospora    | profundi      |
| CA-293586 | OP442316 | Actinomycetota | Actinomycetes | Micromonosporales   | Micromonosporaceae    | Micromonospora    | profundi      |
| CA-293587 | OP442317 | Actinomycetota | Actinomycetes | Micromonosporales   | Micromonosporaceae    | Micromonospora    | profundi      |
| CA-293588 | OP442318 | Actinomycetota | Actinomycetes | Streptomyces        | Streptomyces          | Streptomyces      | laurentii     |

|           |          |                |               |                     |                       |                   |                     |
|-----------|----------|----------------|---------------|---------------------|-----------------------|-------------------|---------------------|
| CA-293589 | OP442319 | Actinomycetota | Actinomycetes | Streptomycetales    | Streptomycetaceae     | Streptomyces      | puniceus            |
| CA-293590 | OP442320 | Actinomycetota | Actinomycetes | Micrococcales       | Promicromonosporaceae | Promicromonospora | iranensis           |
| CA-293591 | OP442321 | Actinomycetota | Actinomycetes | Streptomycetales    | Streptomycetaceae     | Streptomyces      | arcticus            |
| CA-293592 | OP442322 | Actinomycetota | Actinomycetes | Streptomycetales    | Streptomycetaceae     | Streptomyces      | arcticus            |
| CA-293593 | OP442323 | Actinomycetota | Actinomycetes | Streptomycetales    | Streptomycetaceae     | Streptomyces      | arcticus            |
| CA-293594 | OP442324 | Actinomycetota | Actinomycetes | Streptomycetales    | Streptomycetaceae     | Streptomyces      | armeniacus          |
| CA-293595 | OP442325 | Actinomycetota | Actinomycetes | Streptomycetales    | Streptomycetaceae     | Streptomyces      | lunaelactis         |
| CA-294218 | OP442326 | Actinomycetota | Actinomycetes | Micromonosporales   | Micromonosporaceae    | Micromonospora    | vinacea             |
| CA-294219 | OP442327 | Actinomycetota | Actinomycetes | Micromonosporales   | Micromonosporaceae    | Micromonospora    | vinacea             |
| CA-294220 | OP442328 | Actinomycetota | Actinomycetes | Streptomycetales    | Streptomycetaceae     | Streptomyces      | shaanxiensis        |
| CA-294221 | OP442329 | Actinomycetota | Actinomycetes | Streptomycetales    | Streptomycetaceae     | Streptomyces      | arcticus            |
| CA-294223 | OP442330 | Actinomycetota | Actinomycetes | Streptosporangiales | Streptosporangiaceae  | Nonomuraea        | glycinis            |
| CA-294838 | OP442331 | Actinomycetota | Actinomycetes | Micromonosporales   | Micromonosporaceae    | Micromonospora    | vinacea             |
| CA-294839 | OP442332 | Actinomycetota | Actinomycetes | Streptomycetales    | Streptomycetaceae     | Streptomyces      | diastatochromogenes |
| CA-294840 | OP442333 | Actinomycetota | Actinomycetes | Micromonosporales   | Micromonosporaceae    | Micromonospora    | vinacea             |
| CA-294842 | OP442334 | Actinomycetota | Actinomycetes | Streptomycetales    | Streptomycetaceae     | Streptomyces      | sampsonii           |
| CA-294843 | OP442335 | Actinomycetota | Actinomycetes | Micromonosporales   | Micromonosporaceae    | Micromonospora    | vinacea             |
| CB-290381 | OP442336 | Actinomycetota | Actinomycetes | Micrococcales       | Micrococcaceae        | Micrococcus       | yunnanensis         |
| CB-290382 | OP442337 | Actinomycetota | Actinomycetes | Micrococcales       | Micrococcaceae        | Kocuria           | rosea               |
| CB-290384 | OP442338 | Actinomycetota | Actinomycetes | Geodermatophilales  | Geodermatophilaceae   | Modestobacter     | caceresii           |
| CB-290385 | OP442339 | Actinomycetota | Actinomycetes | Kineosporiales      | Kineosporiaceae       | Angustibacter     | speluncae           |
| CB-290386 | OP442340 | Actinomycetota | Actinomycetes | Micrococcales       | Micrococcaceae        | Kocuria           | rosea               |
| CB-290525 | OP442341 | Actinomycetota | Actinomycetes | Micrococcales       | Brevibacteriaceae     | Brevibacterium    | casei               |
| CB-290530 | OP442342 | Actinomycetota | Actinomycetes | Micrococcales       | Micrococcaceae        | Arthrobacter      | subterraneus        |
| CB-290531 | OP442343 | Actinomycetota | Actinomycetes | Micrococcales       | Microbacteriaceae     | Curtobacterium    | oceanosedimentum    |
| CB-290532 | OP442344 | Actinomycetota | Actinomycetes | Micrococcales       | Micrococcaceae        | Arthrobacter      | agilis              |
| CB-290540 | OP442345 | Actinomycetota | Actinomycetes | Propionibacteriales | Propionibacteriaceae  | Friedmanniella    | lacustris           |
| CB-291208 | OP442346 | Actinomycetota | Actinomycetes | Micrococcales       | Microbacteriaceae     | Microbacterium    | oleivorans          |
| CB-294255 | OP442347 | Actinomycetota | Actinomycetes | Propionibacteriales | Nocardioidaceae       | Nocardioides      | zeicaulis           |

|           |          |                |               |                     |                       |                   |                  |
|-----------|----------|----------------|---------------|---------------------|-----------------------|-------------------|------------------|
| CB-294260 | OP442348 | Actinomycetota | Actinomycetes | Propionibacteriales | Nocardioidaceae       | Aeromicrobium     | choanae          |
| CB-294262 | OP442349 | Actinomycetota | Actinomycetes | Micrococcales       | Micrococcaceae        | Pseudarthrobacter | oxydans          |
| CB-294264 | OP442350 | Actinomycetota | Actinomycetes | Micrococcales       | Microbacteriaceae     | Microbacterium    | yannicii         |
| CB-294268 | OP442351 | Actinomycetota | Actinomycetes | Propionibacteriales | Nocardioidaceae       | Nocardioides      | dokdonensis      |
| CB-294451 | OP442352 | Actinomycetota | Actinomycetes | Propionibacteriales | Nocardioidaceae       | Nocardioides      | glacieisoli      |
| CB-294452 | OP442353 | Actinomycetota | Actinomycetes | Micrococcales       | Microbacteriaceae     | Agrococcus        | citreus          |
| CB-294457 | OP442354 | Actinomycetota | Actinomycetes | Mycobacteriales     | Mycobacteriaceae      | Mycolicibacterium | insubricum       |
| CB-294458 | OP442355 | Actinomycetota | Actinomycetes | Micrococcales       | Dermabacteraceae      | Brachybacterium   | phenoliresistens |
| CB-294462 | OP442356 | Actinomycetota | Actinomycetes | Micrococcales       | Brevibacteriaceae     | Brevibacterium    | frigoritolerans  |
| CB-294466 | OP442357 | Actinomycetota | Actinomycetes | Micrococcales       | Promicromonosporaceae | Isoptericola      | chiayiensis      |
| CB-294467 | OP442358 | Actinomycetota | Actinomycetes | Propionibacteriales | Nocardioidaceae       | Nocardioides      | furvisabuli      |
| CB-294484 | OP442359 | Actinomycetota | Actinomycetes | Micrococcales       | Brevibacteriaceae     | Brevibacterium    | frigoritolerans  |
| CB-294486 | OP442360 | Actinomycetota | Actinomycetes | Micrococcales       | Microbacteriaceae     | Agrococcus        | citreus          |

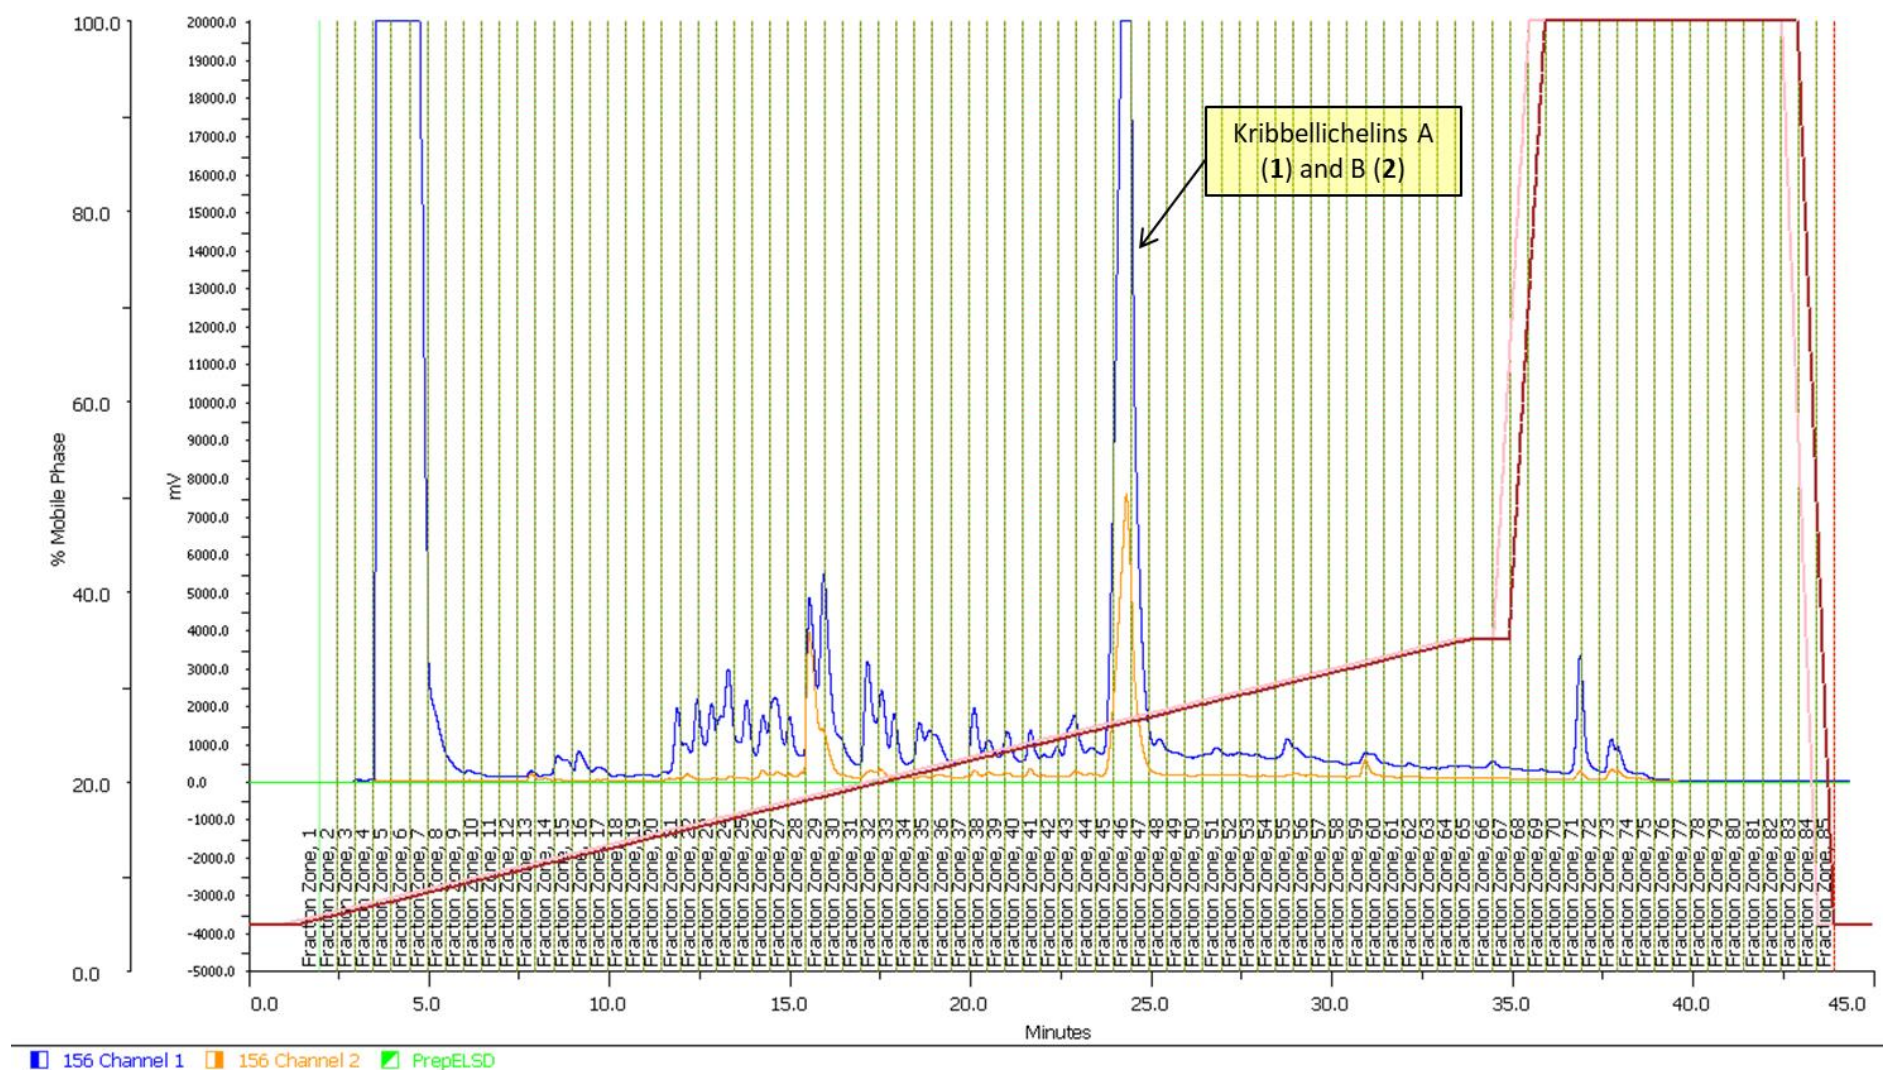

**Figure S1.** LC-UV (210, orange, and 280, blue trace, nm) chromatogram of fraction FS013 purification by preparative RP-HPLC applying a linear H<sub>2</sub>O:CH<sub>3</sub>CN gradient (5% CH<sub>3</sub>CN: 0-1 min, 5-35%: 1-34 min, 35%: 34-35 min, 35-100%: 35-36 min, 100%: 36-43 min). Both solvents contain 0.1% TFA.



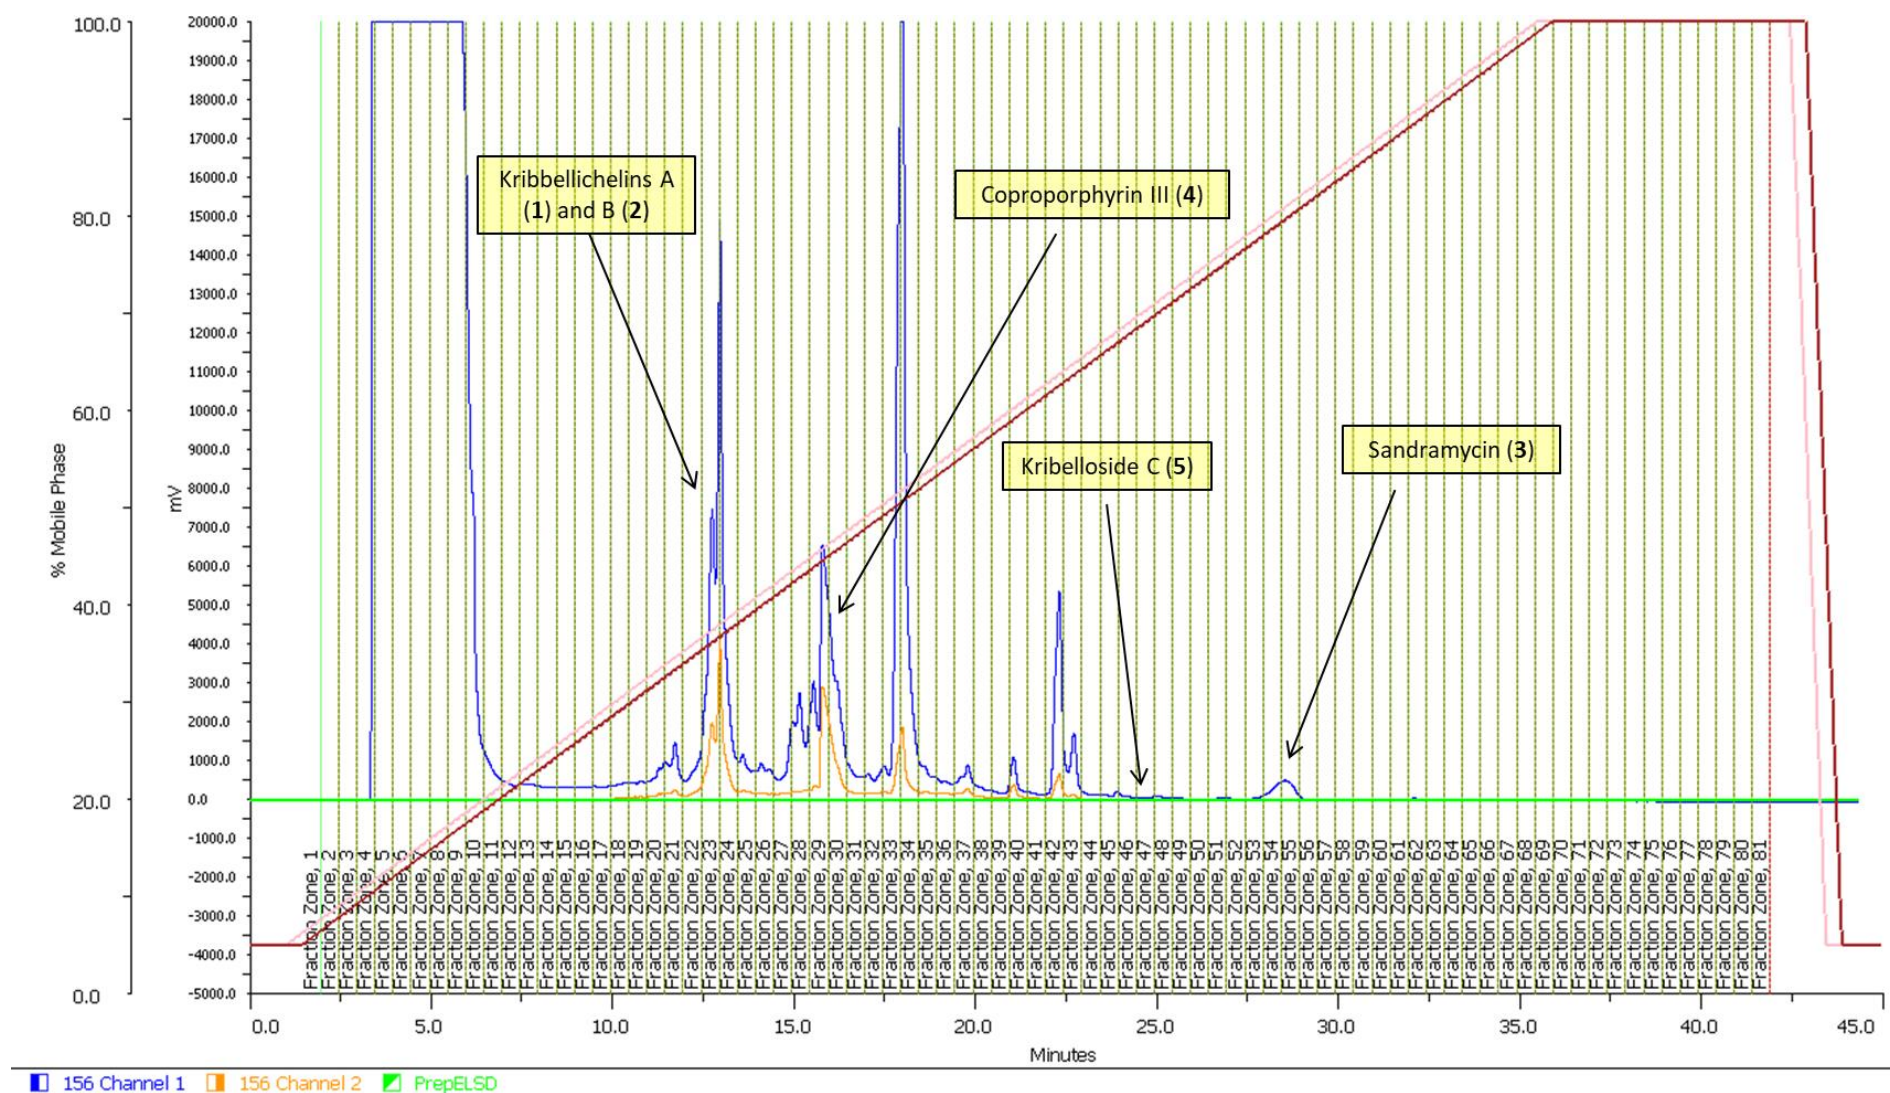

**Figure S2.** LC-UV (210, orange, and 280, blue trace, nm) chromatogram of FS018 purification by preparative RP-HPLC applying a linear H<sub>2</sub>O:CH<sub>3</sub>CN gradient (5% CH<sub>3</sub>CN: 0-1 min, 5-100%: 1-36 min, 100%: 36-43 min). Both solvents contain 0.1% TFA.



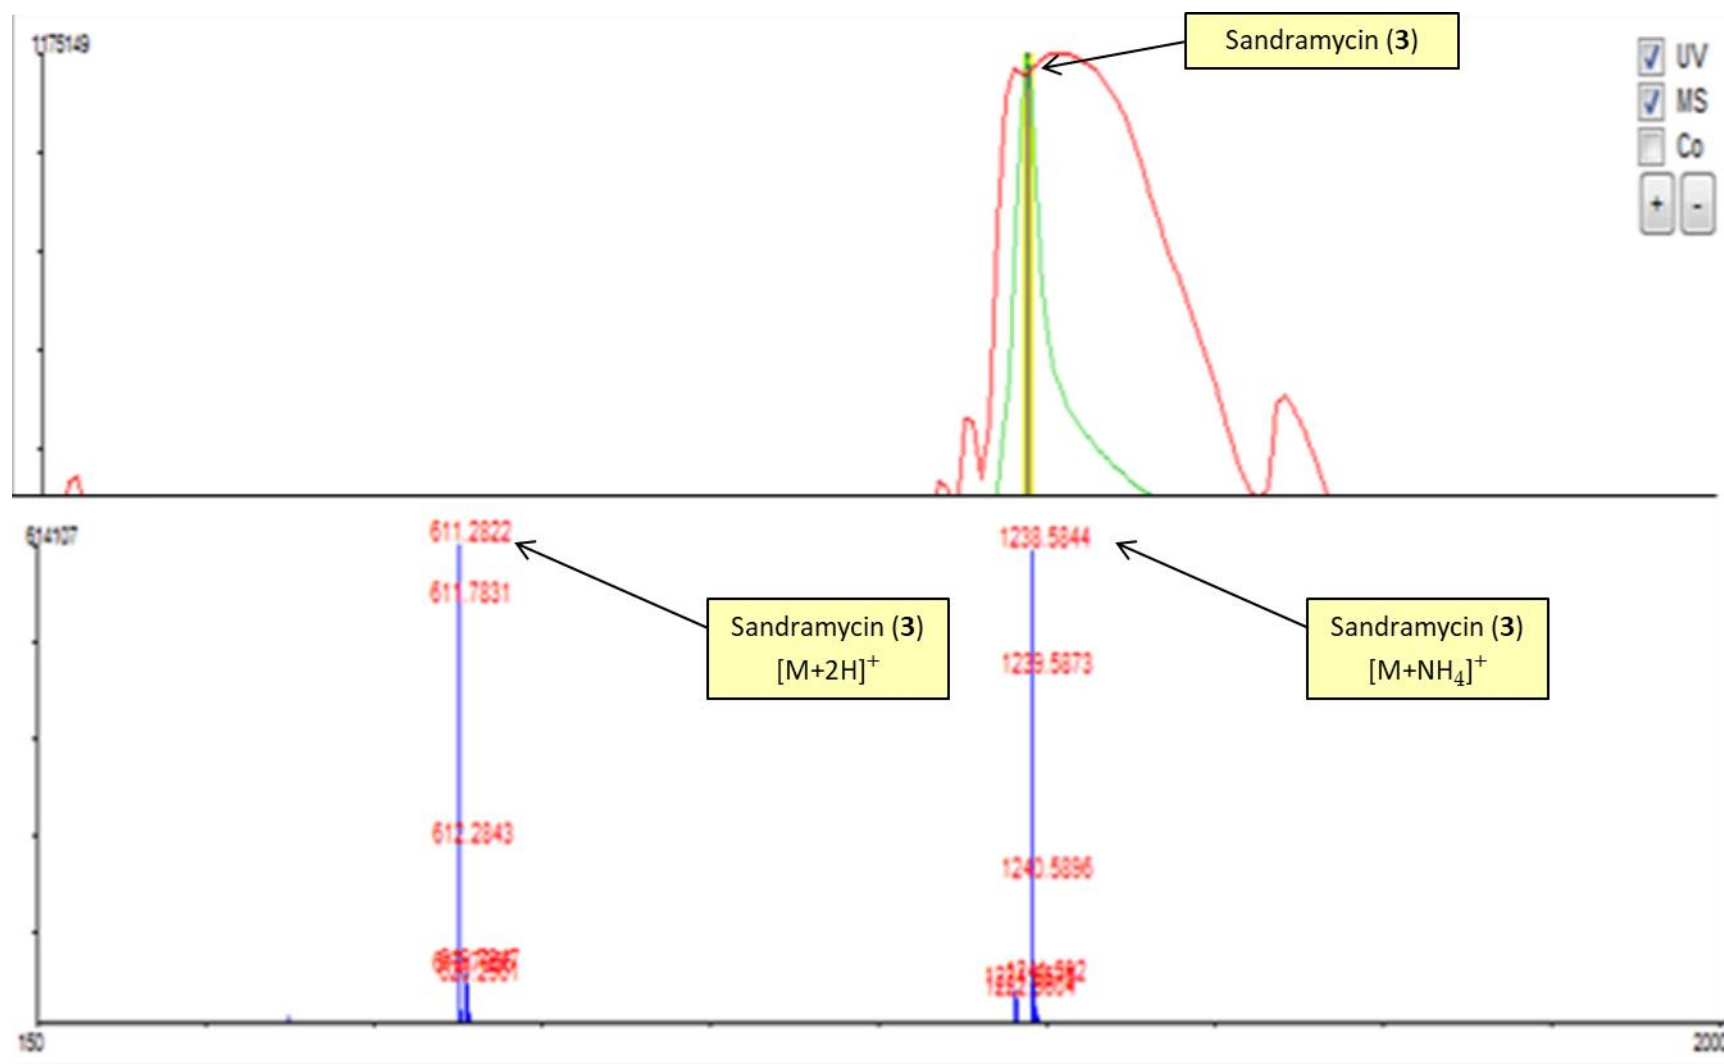

**Figure S3.** LC-HRMS ((+)-ESI-TOF) analysis of FS018 fractions containing compound 3.

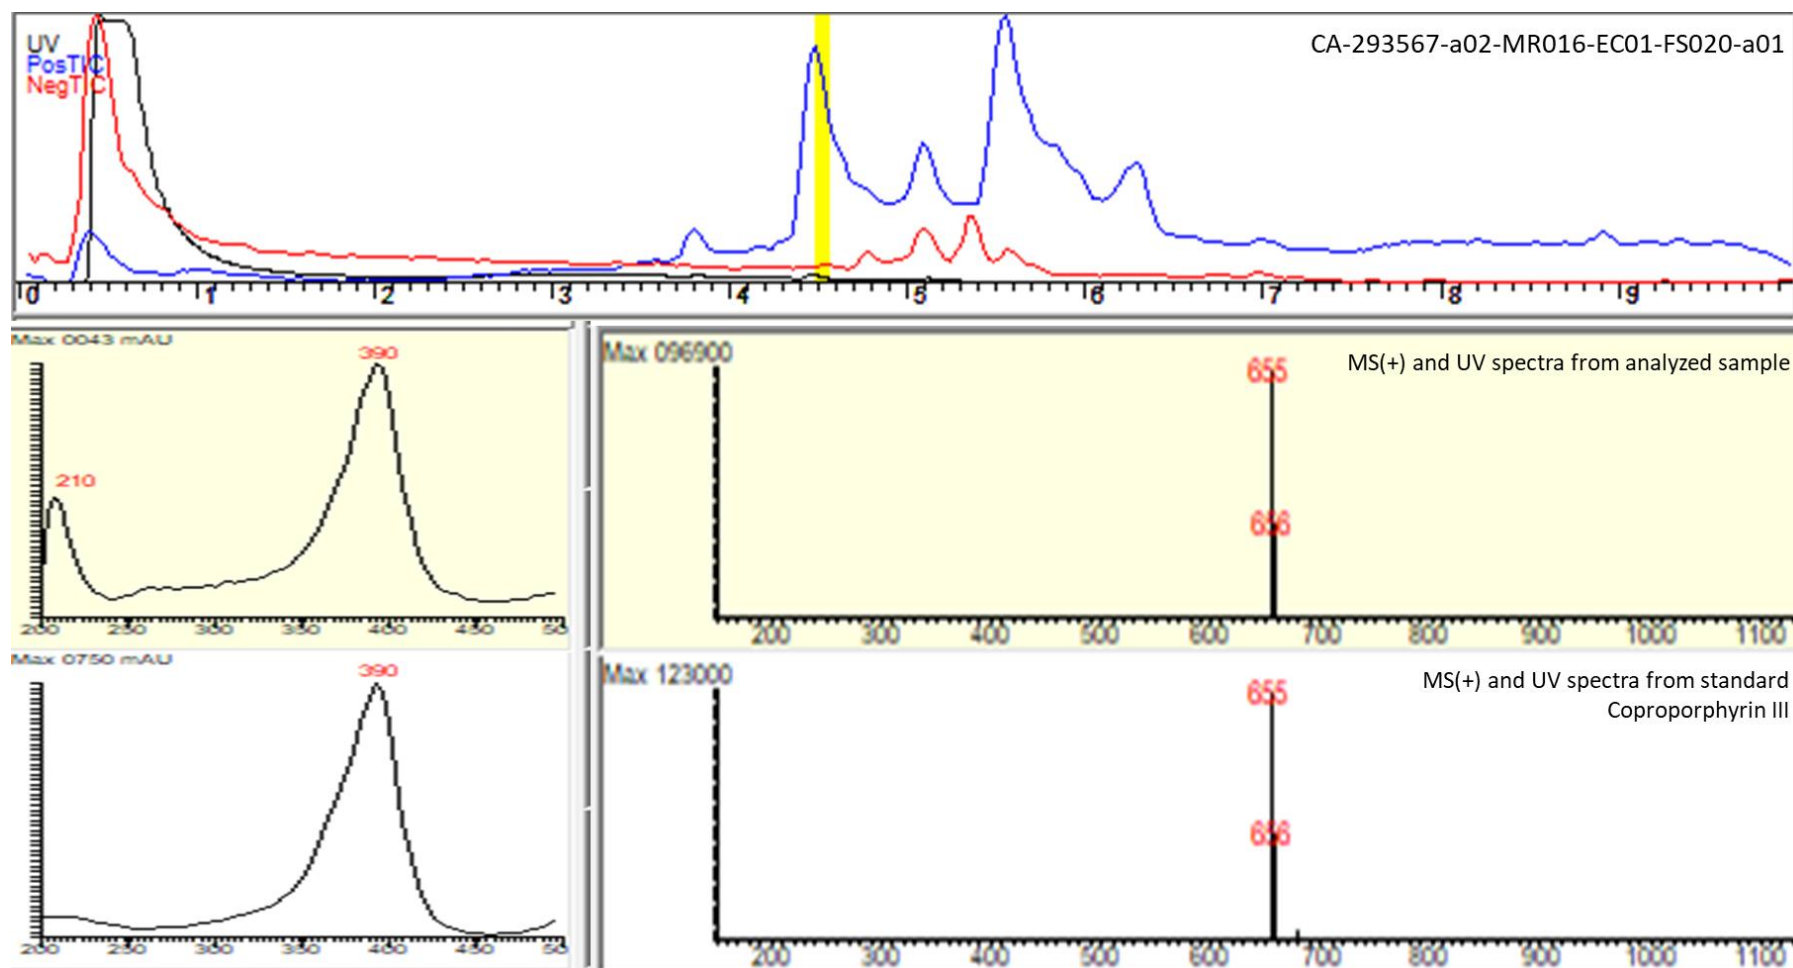

Figure S4. LC-HRMS ((+)-ESI-TOF) analysis of fractions containing compound 4.

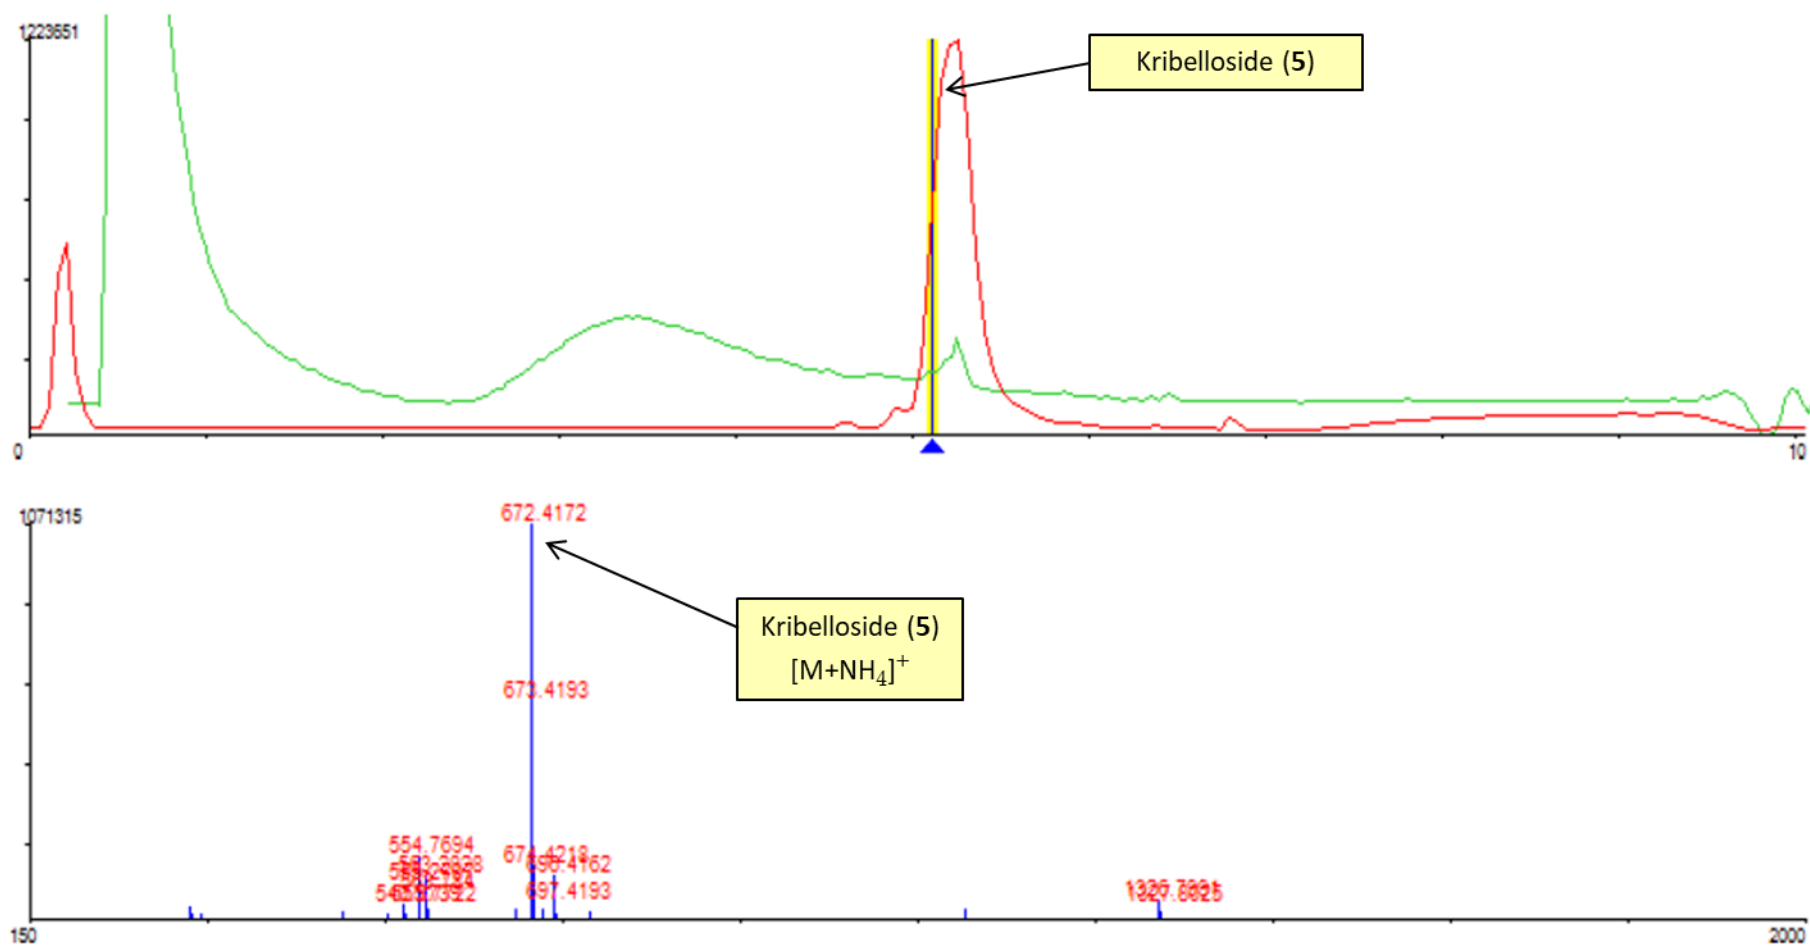

**Figure S5.** LC-HRMS ((+)-ESI-TOF) analysis of FS018 fractions containing compound 5.

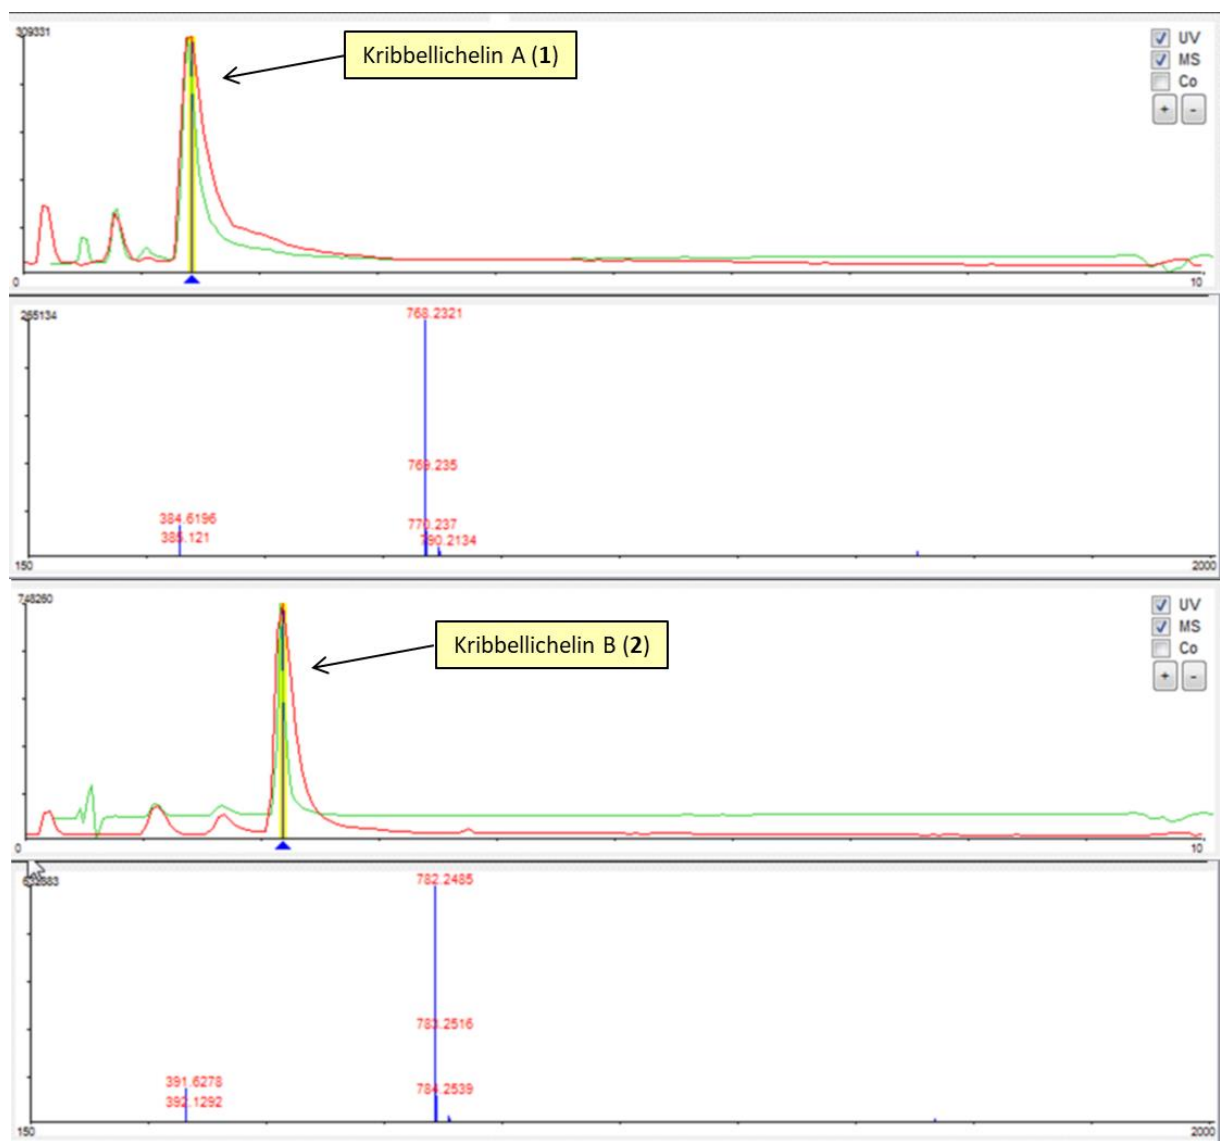

**Figure S6.** LC-HRMS ((+)-ESI-TOF) analysis of fractions containing compounds **1** and **2**.

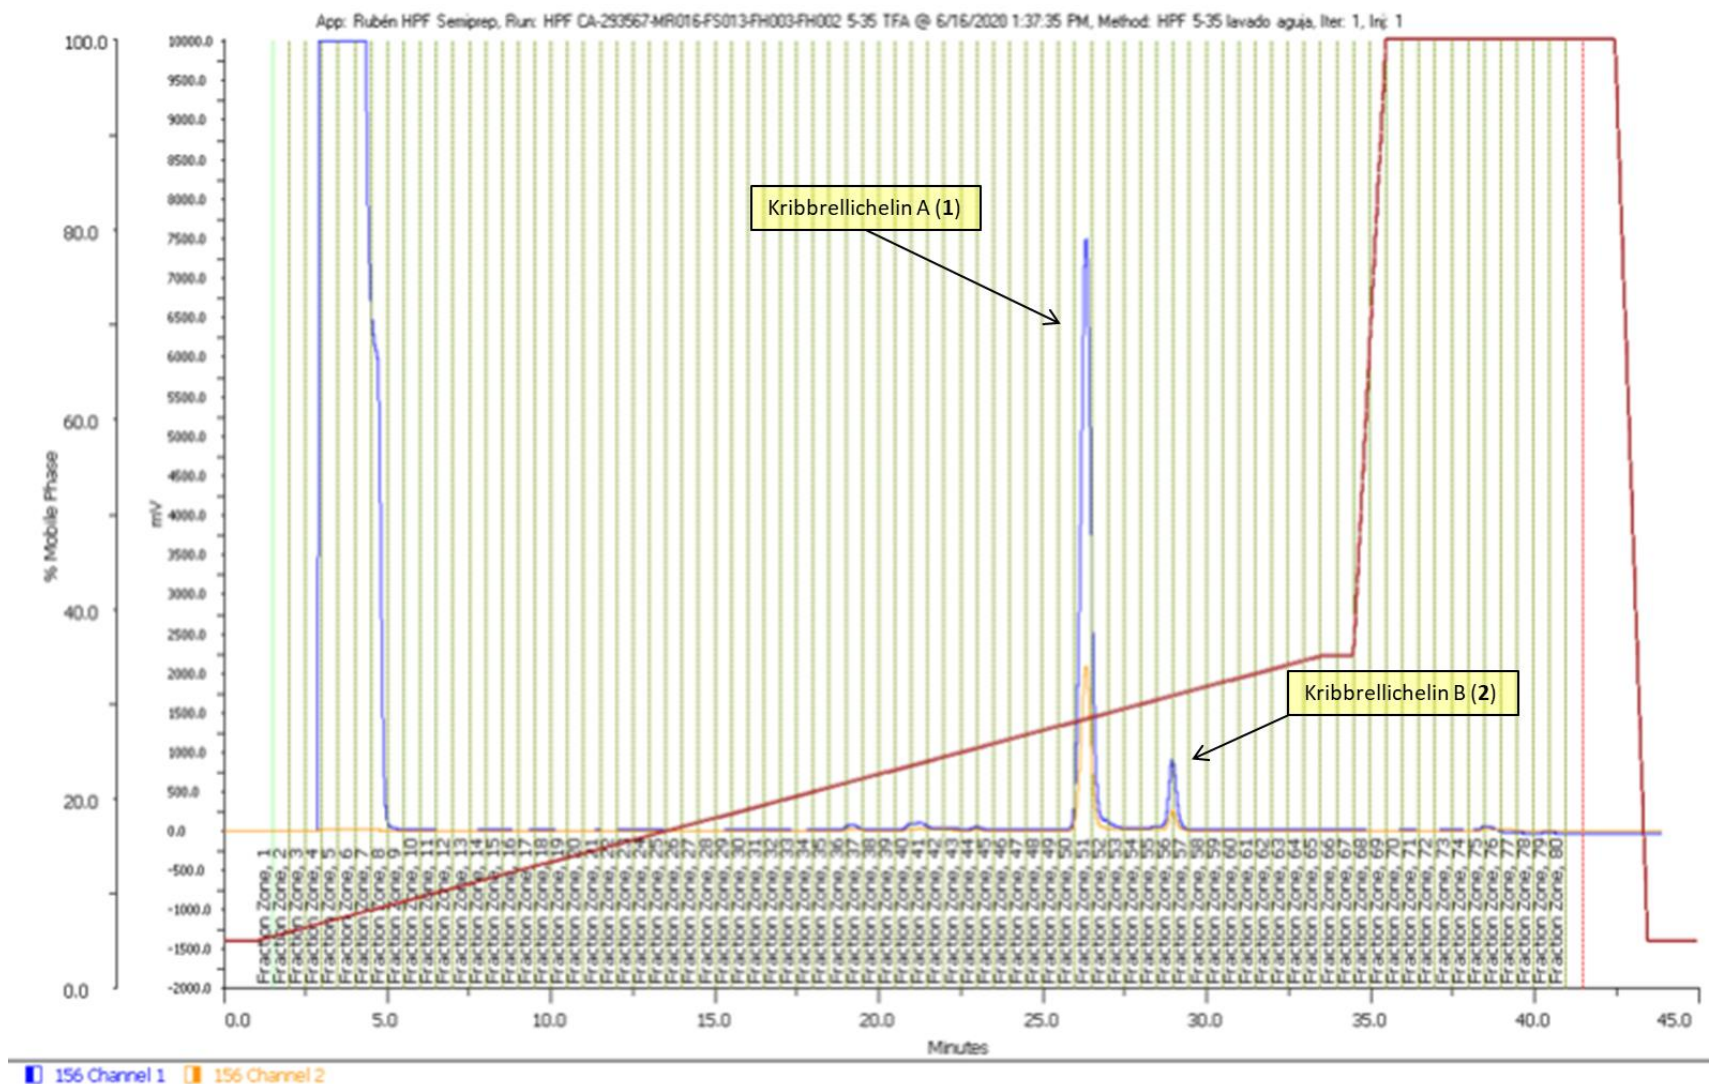

**Figure S7.** LC-UV (210, orange, and 280, blue trace, nm) chromatogram of the purification of fractions containing compounds **1** and **2** by semipreparative RP-HPLC applying a linear H<sub>2</sub>O:CH<sub>3</sub>CN gradient (5% CH<sub>3</sub>CN: 0-1 min, 5-100%: 1-36 min, 100%: 36-43 min). Both solvents contain 0.1% TFA.



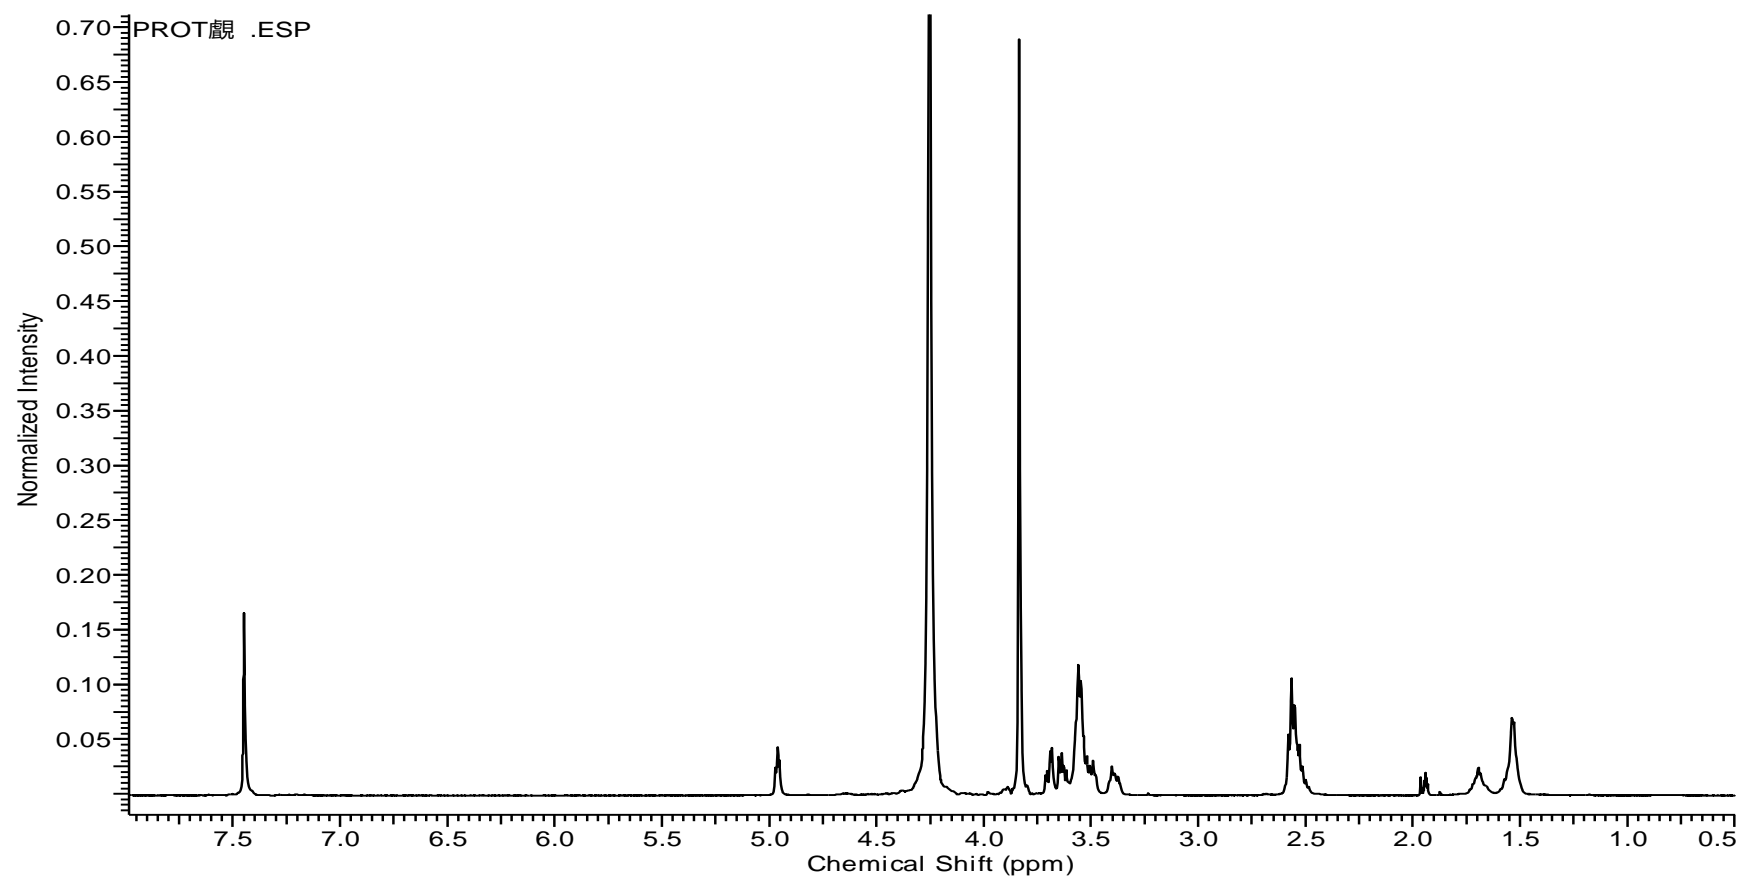

**Figure S8.**  $^1\text{H}$  NMR spectrum of compound **1** ( $\text{CD}_3\text{CN}/\text{D}_2\text{O}$  1:1).

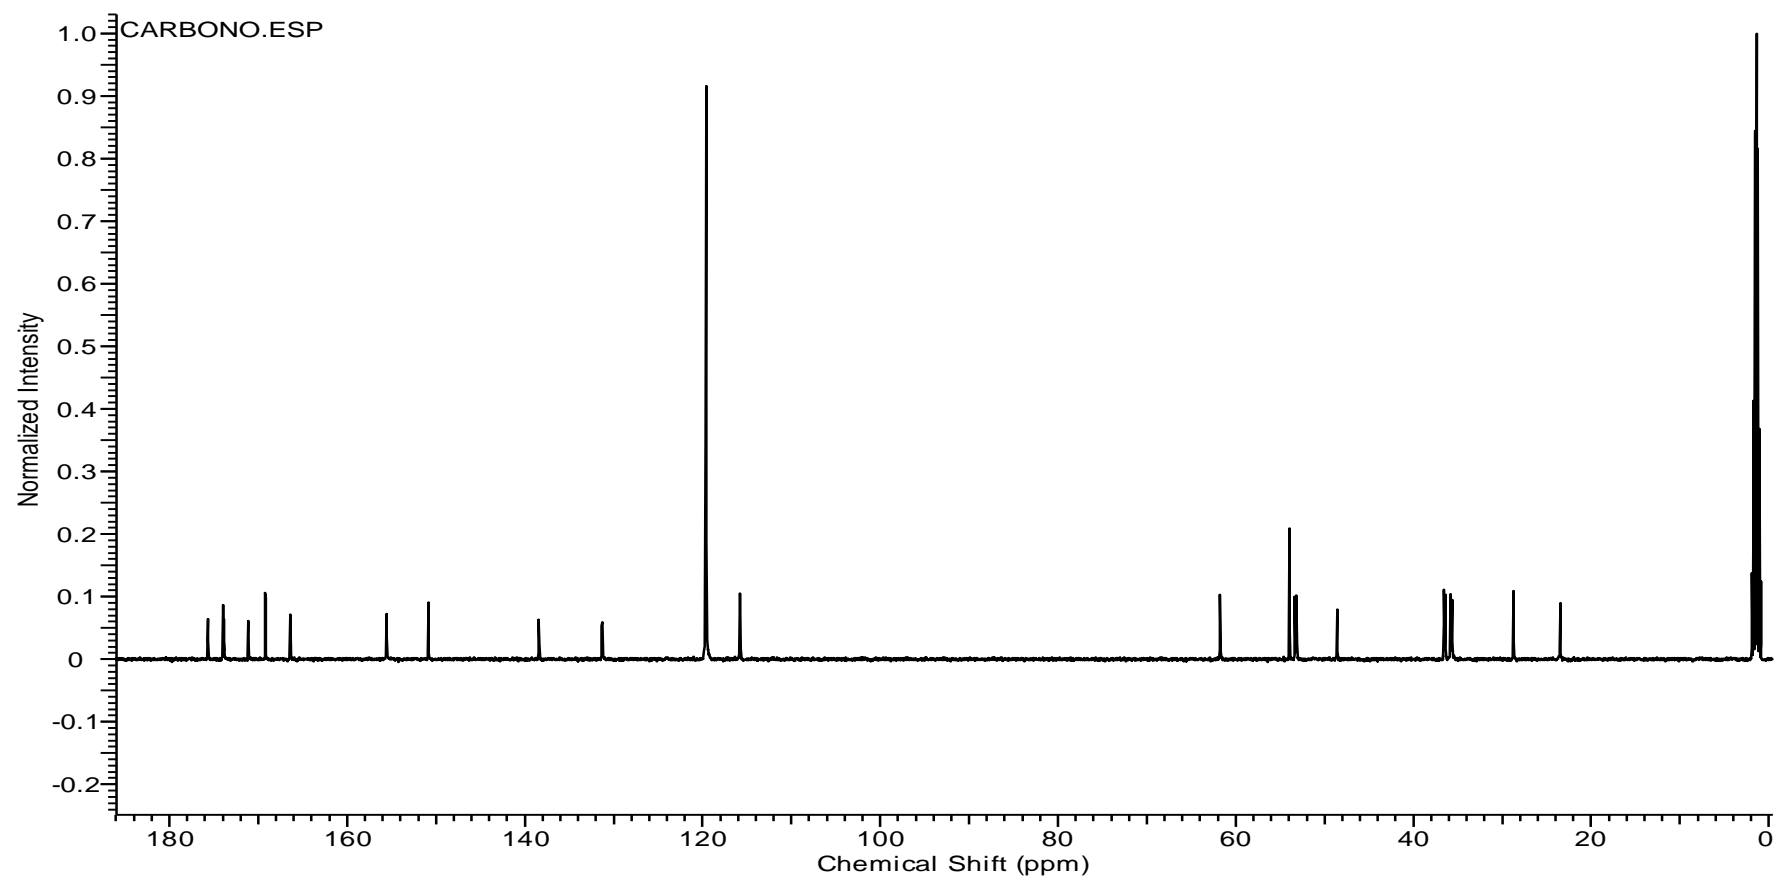

**Figure S9.**  $^{13}\text{C}$  NMR spectrum of compound **1** ( $\text{CD}_3\text{CN}/\text{D}_2\text{O}$  1:1).

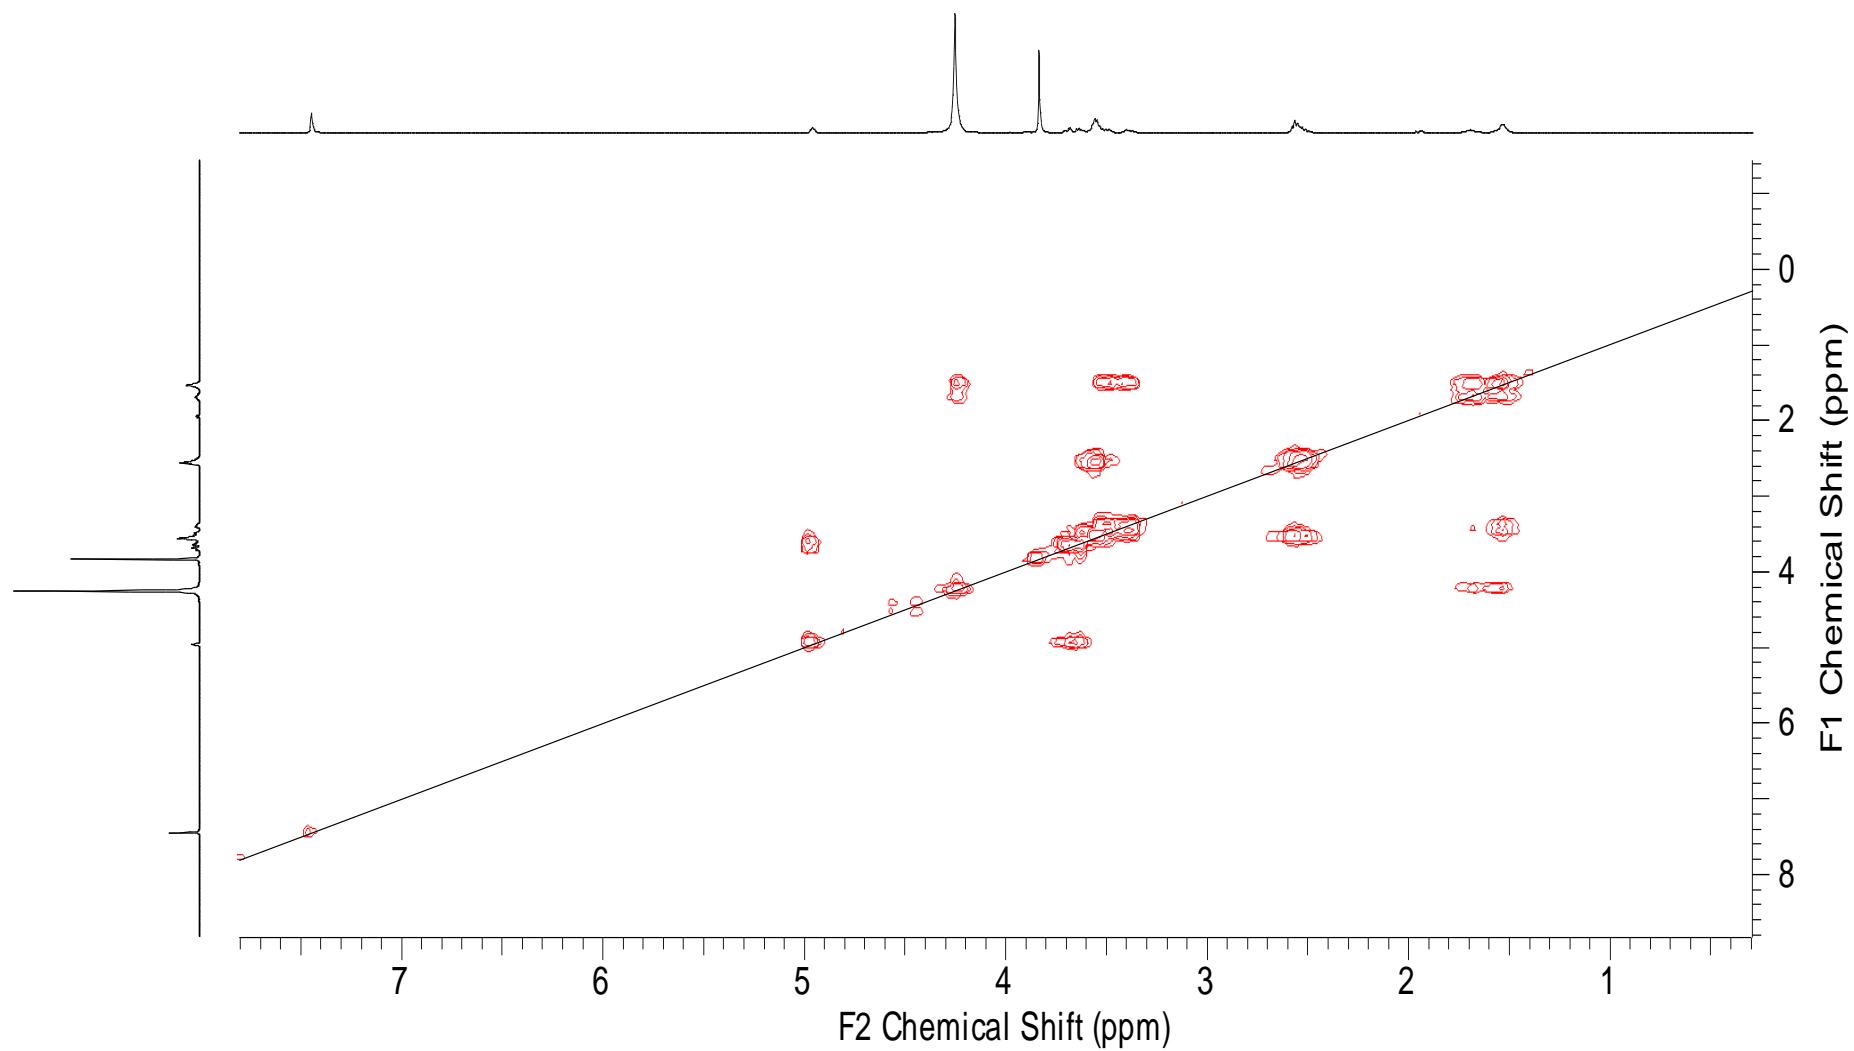

**Figure S10.** COSY spectrum of compound **1** (CD<sub>3</sub>CN/D<sub>2</sub>O 1:1).

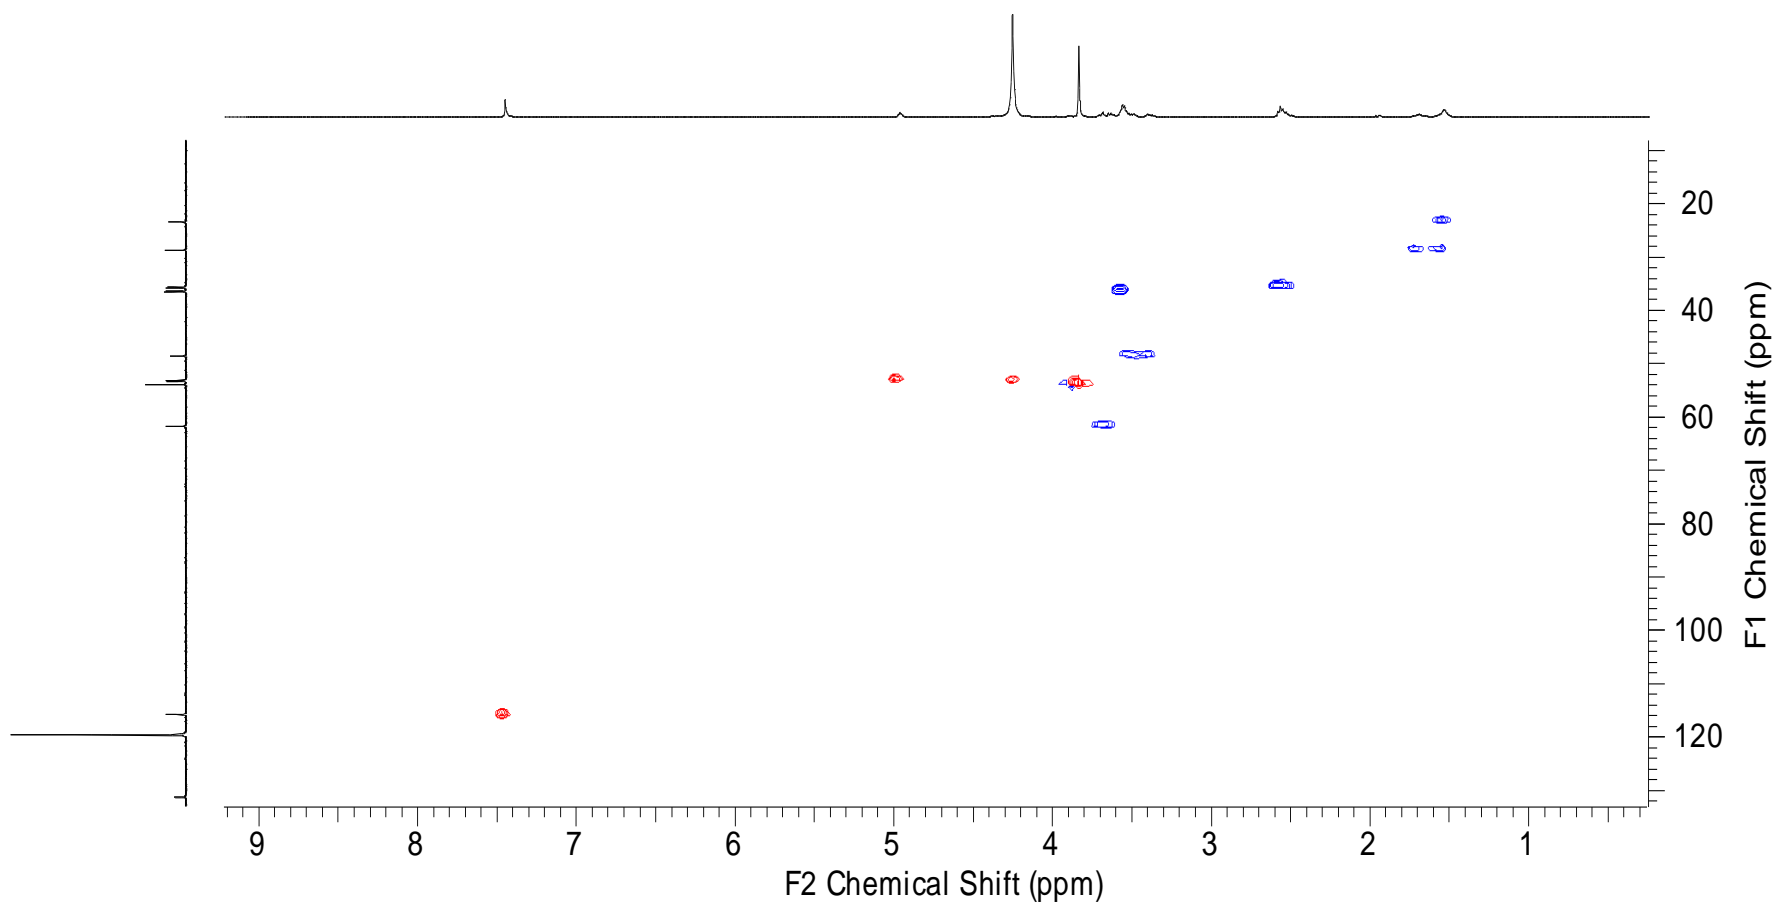

**Figure S11.** HSQC spectrum of compound **1** ( $\text{CD}_3\text{CN}/\text{D}_2\text{O}$  1:1).

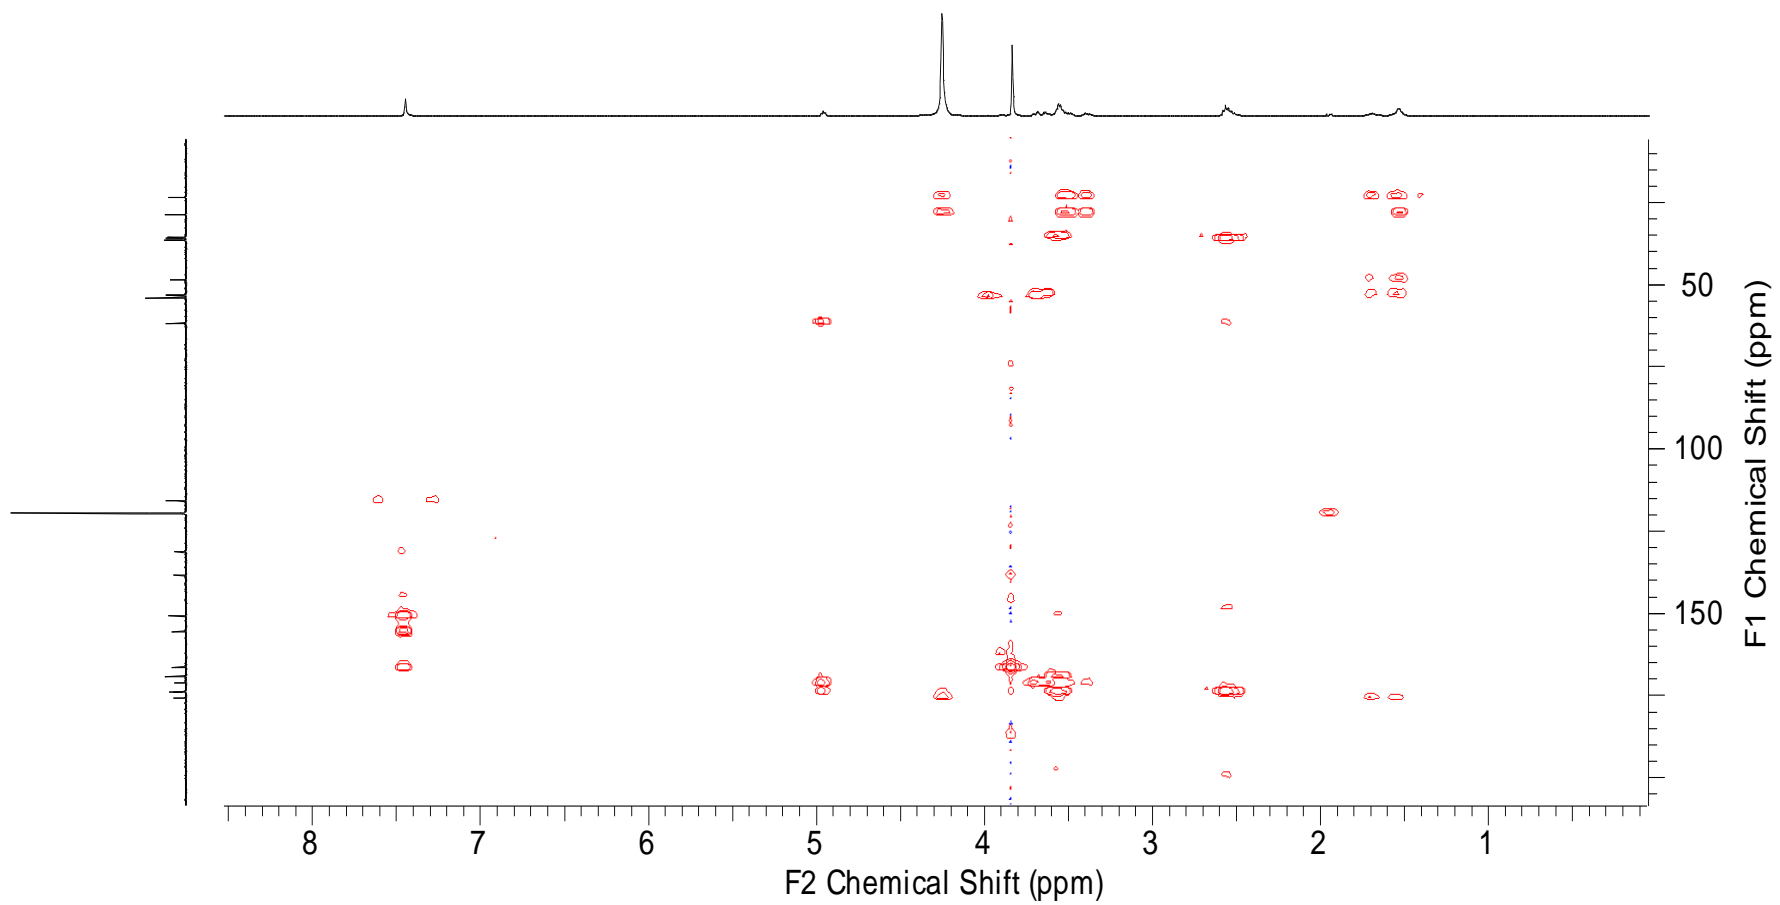

**Figure S12.** HMBC spectrum of compound **1** ( $\text{CD}_3\text{CN}/\text{D}_2\text{O}$  1:1).



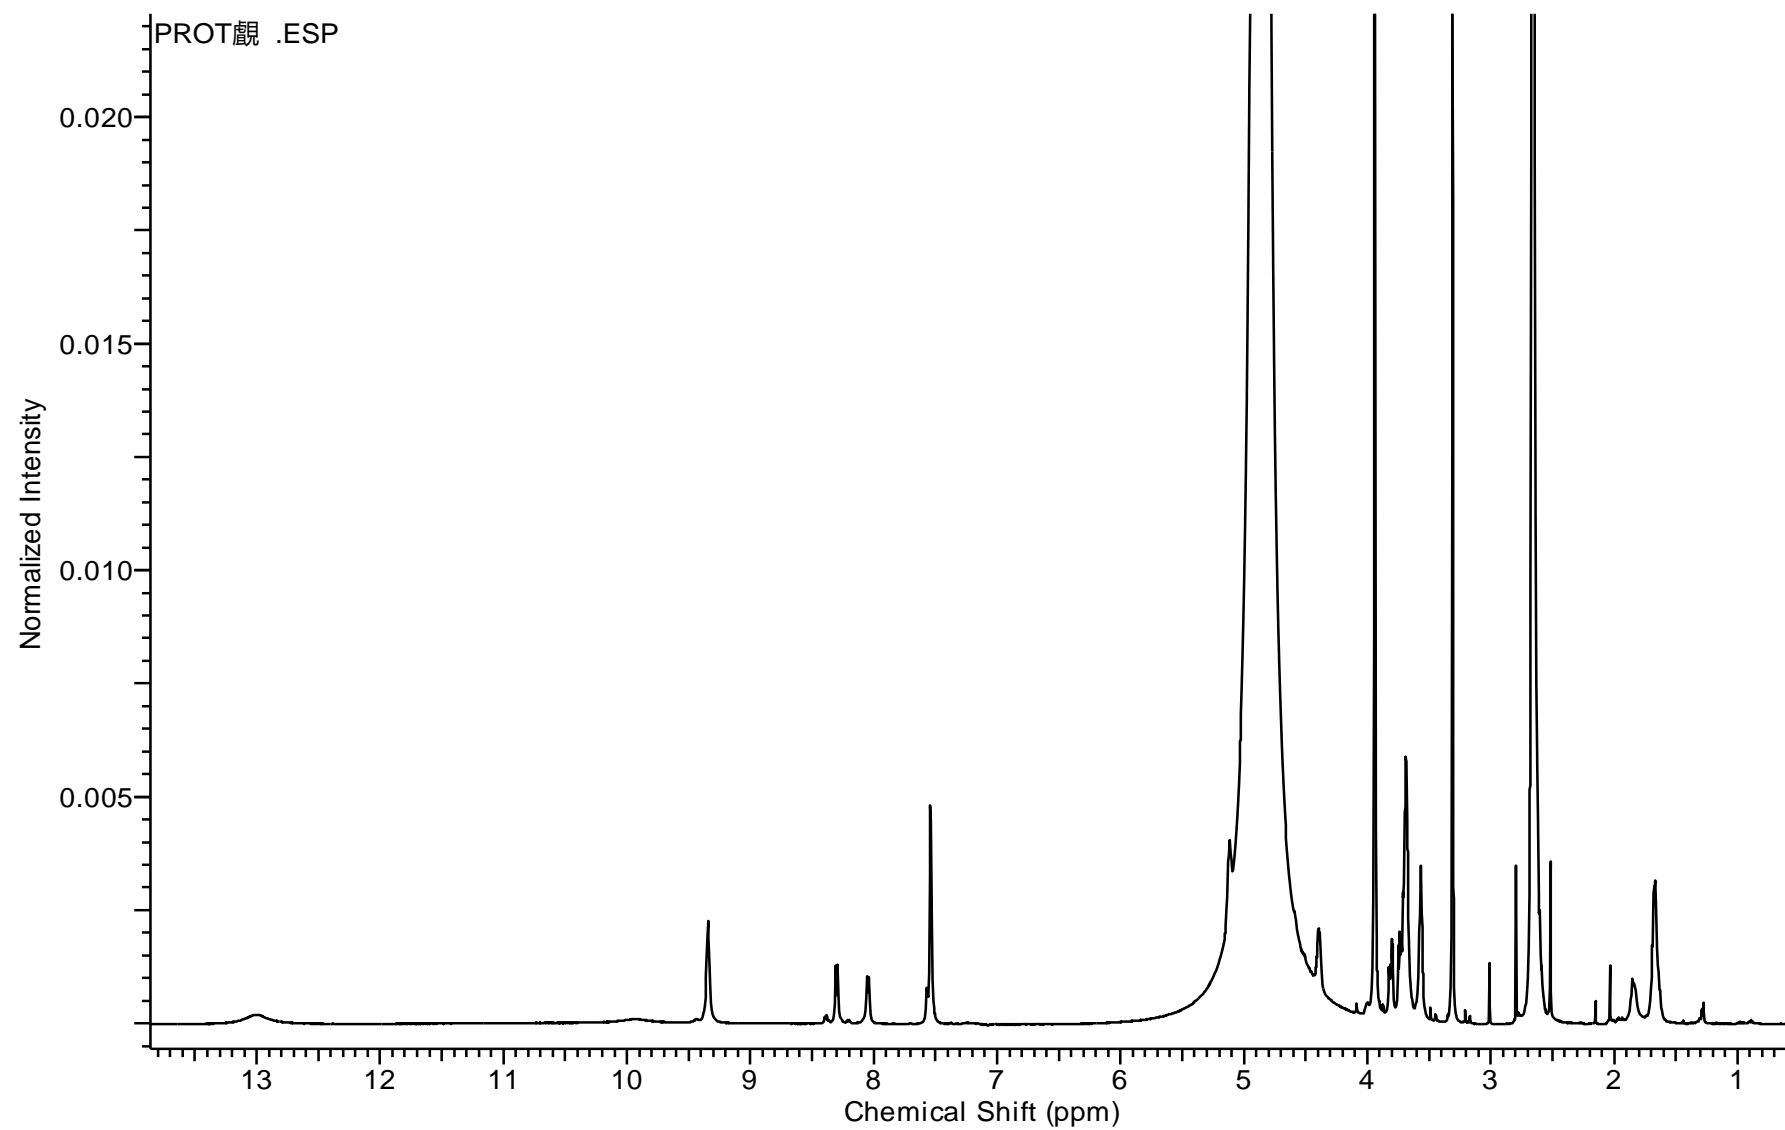

**Figure S13.**  $^1\text{H}$  NMR spectrum of compound **1** ( $\text{CD}_3\text{OH}$ ).

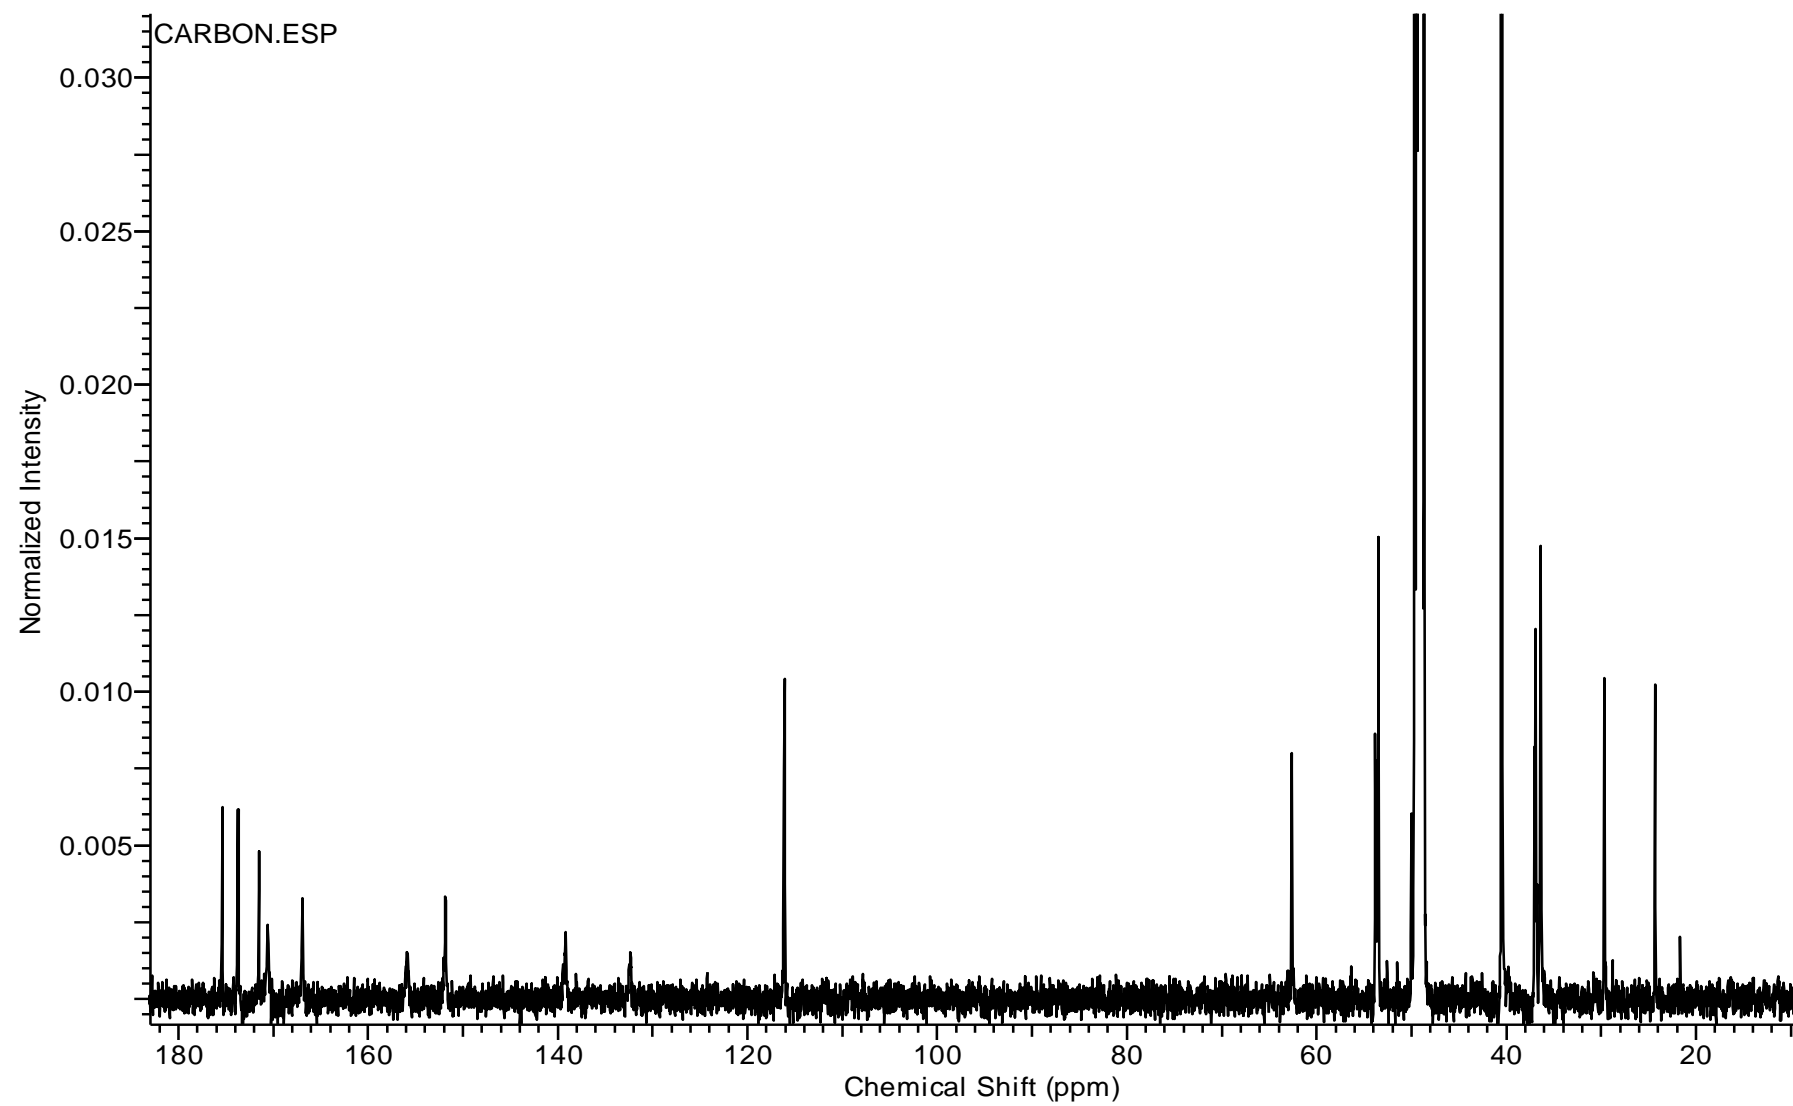

Figure S14.  $^{13}\text{C}$  NMR spectrum of compound **1** ( $\text{CD}_3\text{OH}$ ).

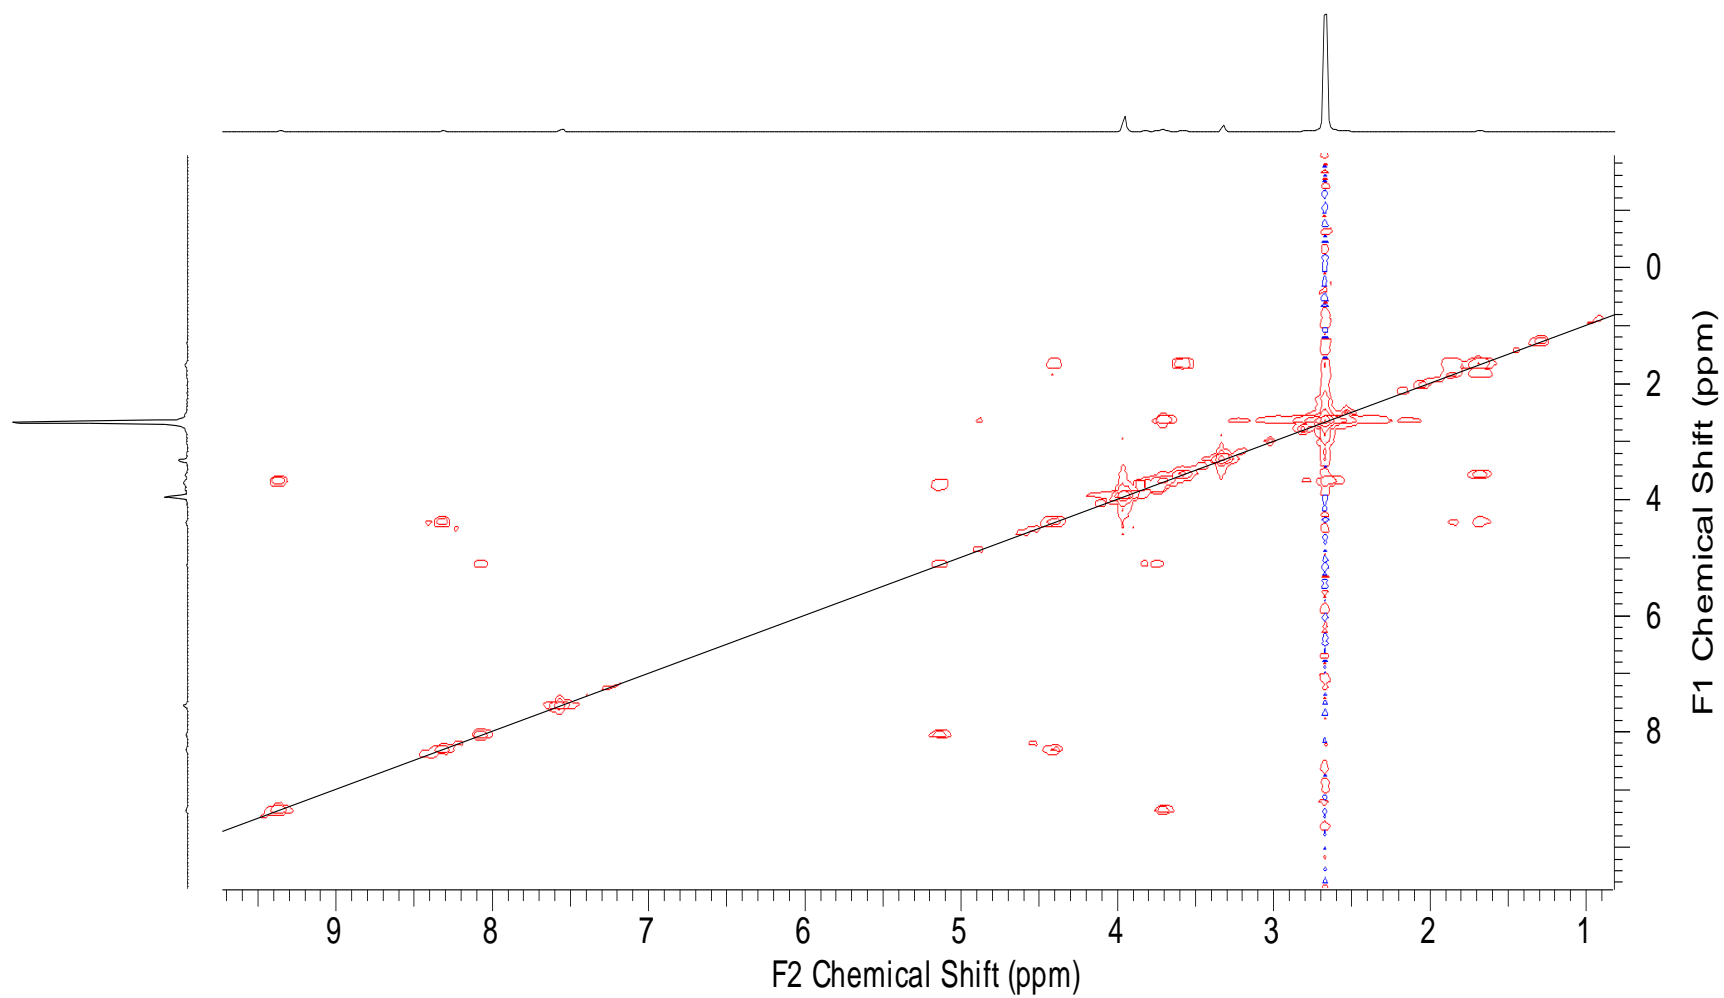

**Figure S15.** COSY spectrum of compound **1** (CD<sub>3</sub>OH).

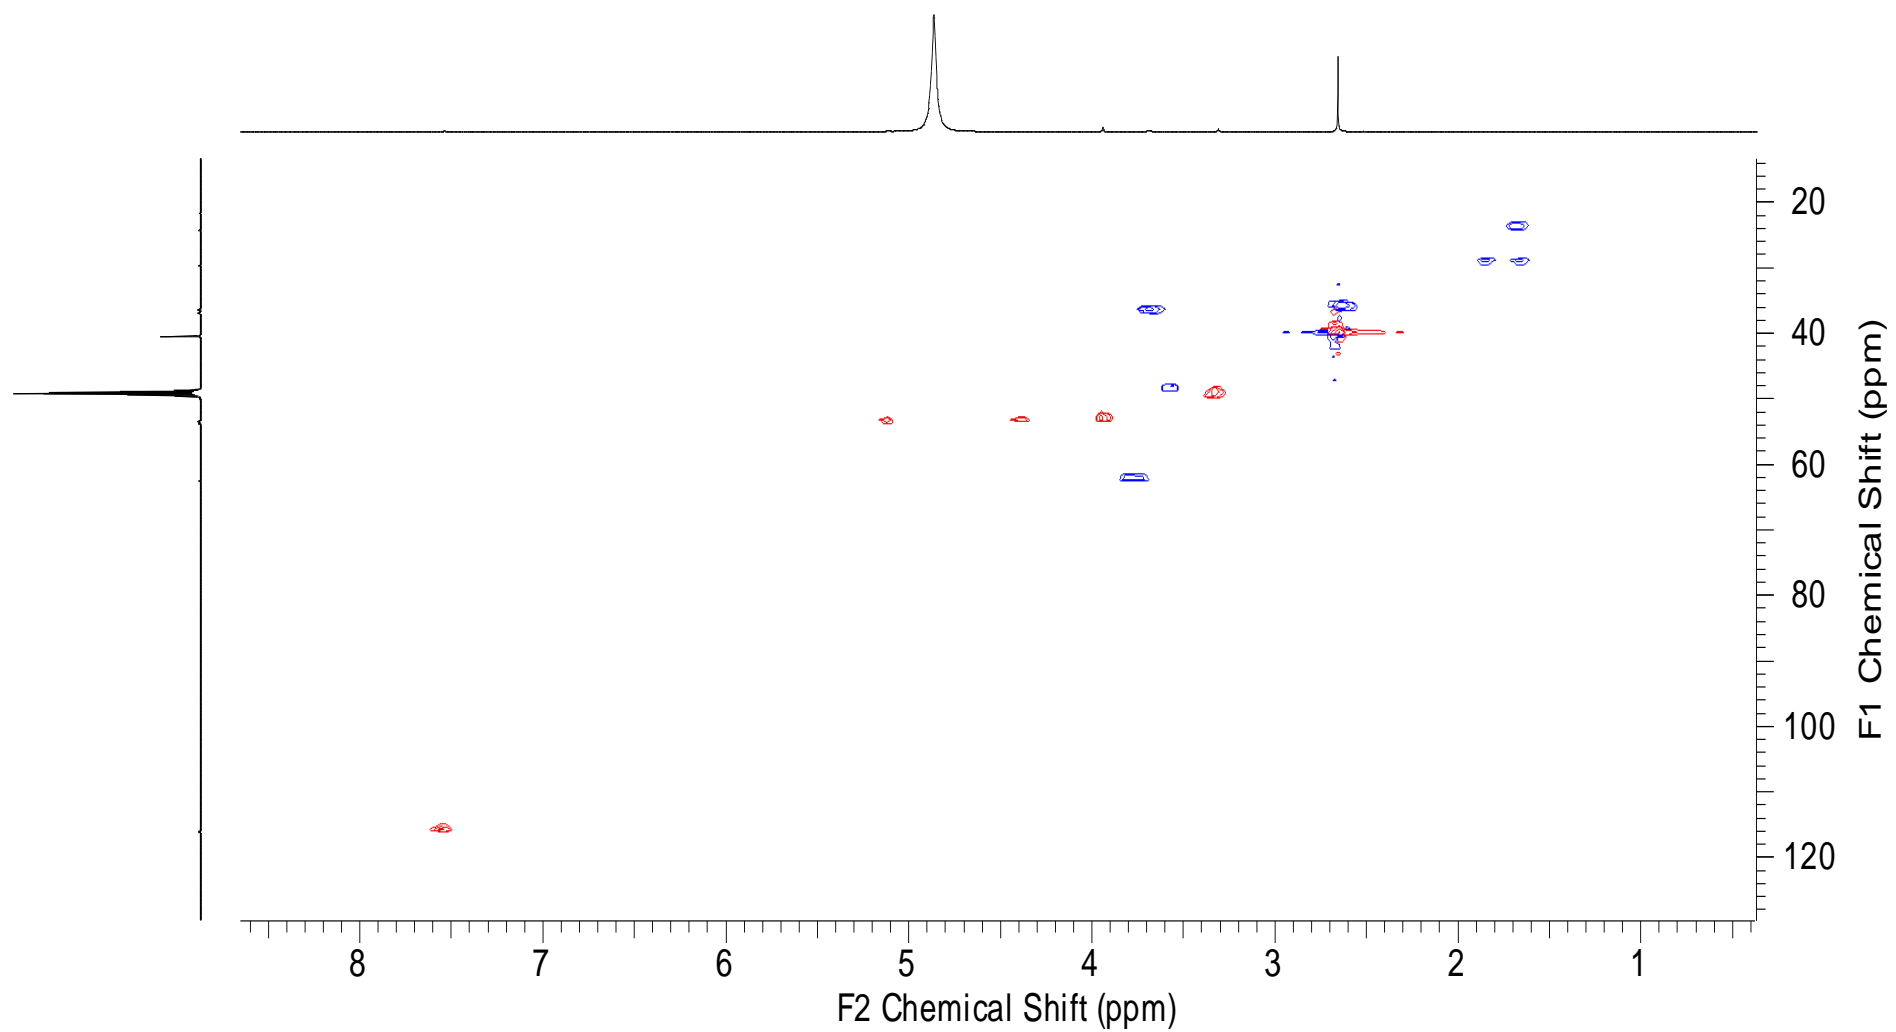

**Figure S16.** HSQC spectrum of compound **1** ( $\text{CD}_3\text{OH}$ ).

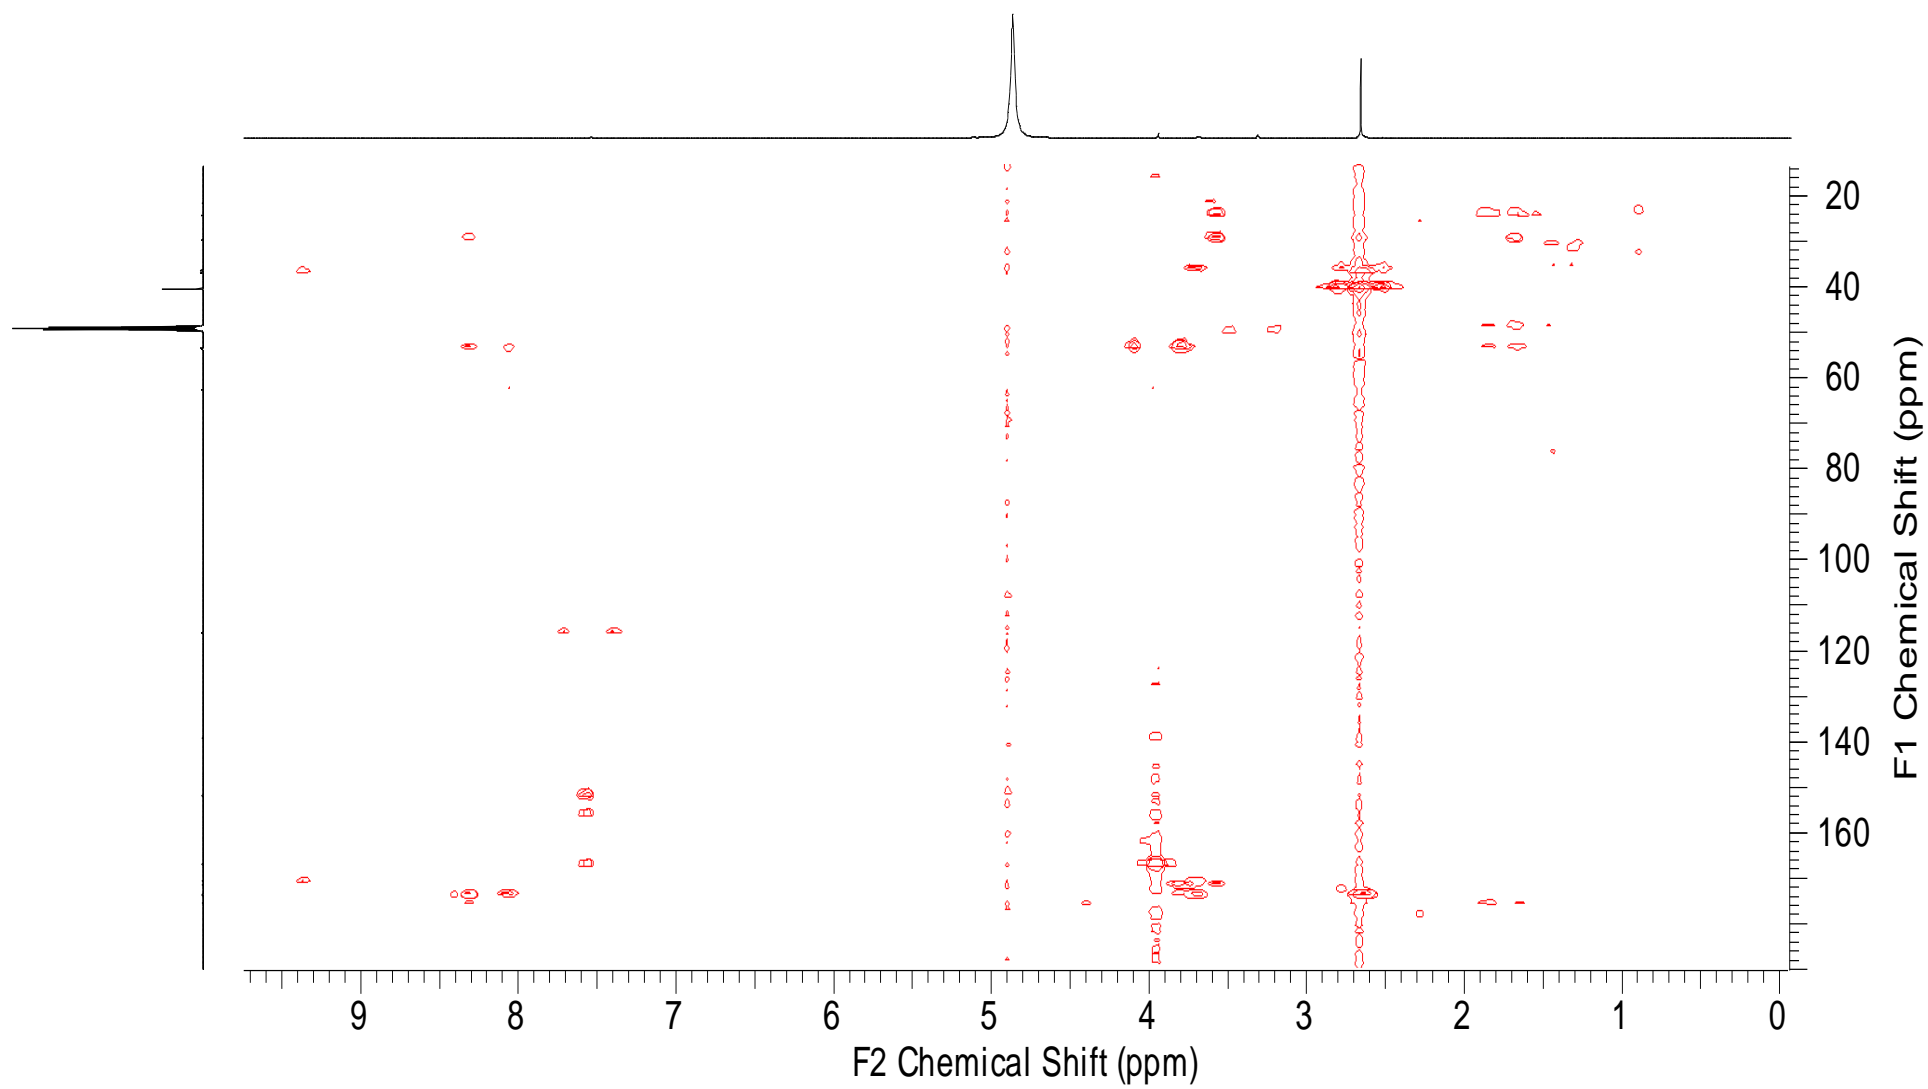

**Figure S17.** HMBC spectrum of compound **1** (CD<sub>3</sub>OH).



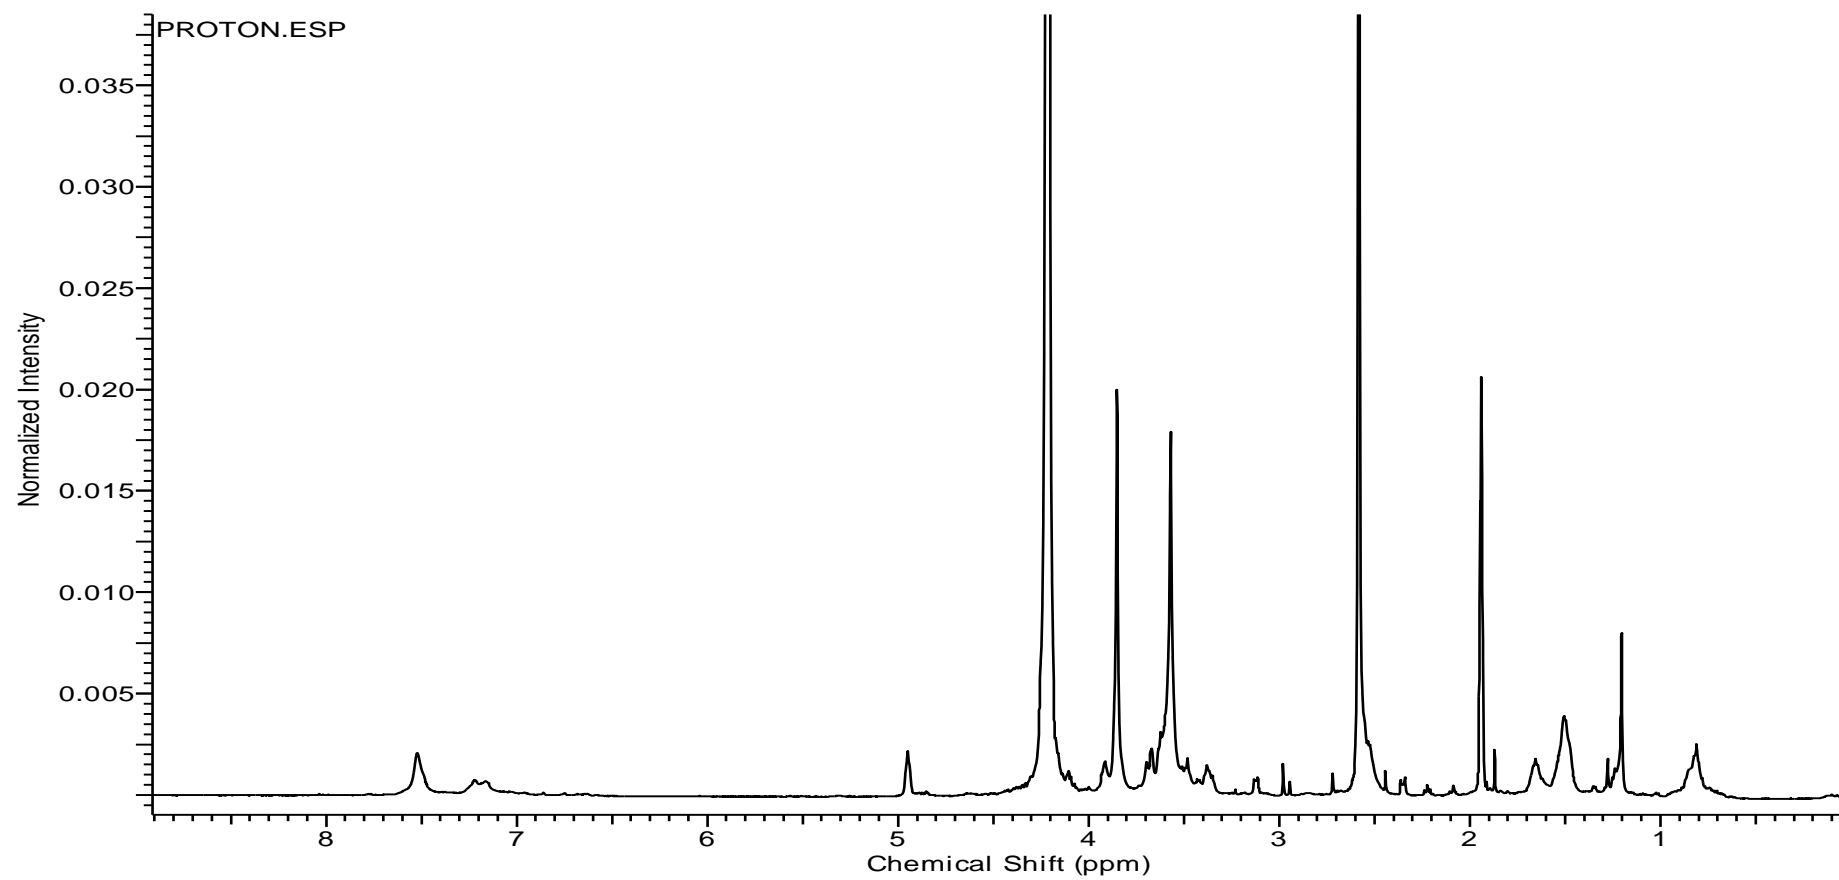

**Figure S18.**  $^1\text{H}$  NMR spectrum of compound **2** ( $\text{CD}_3\text{CN}/\text{D}_2\text{O}$  1:1).

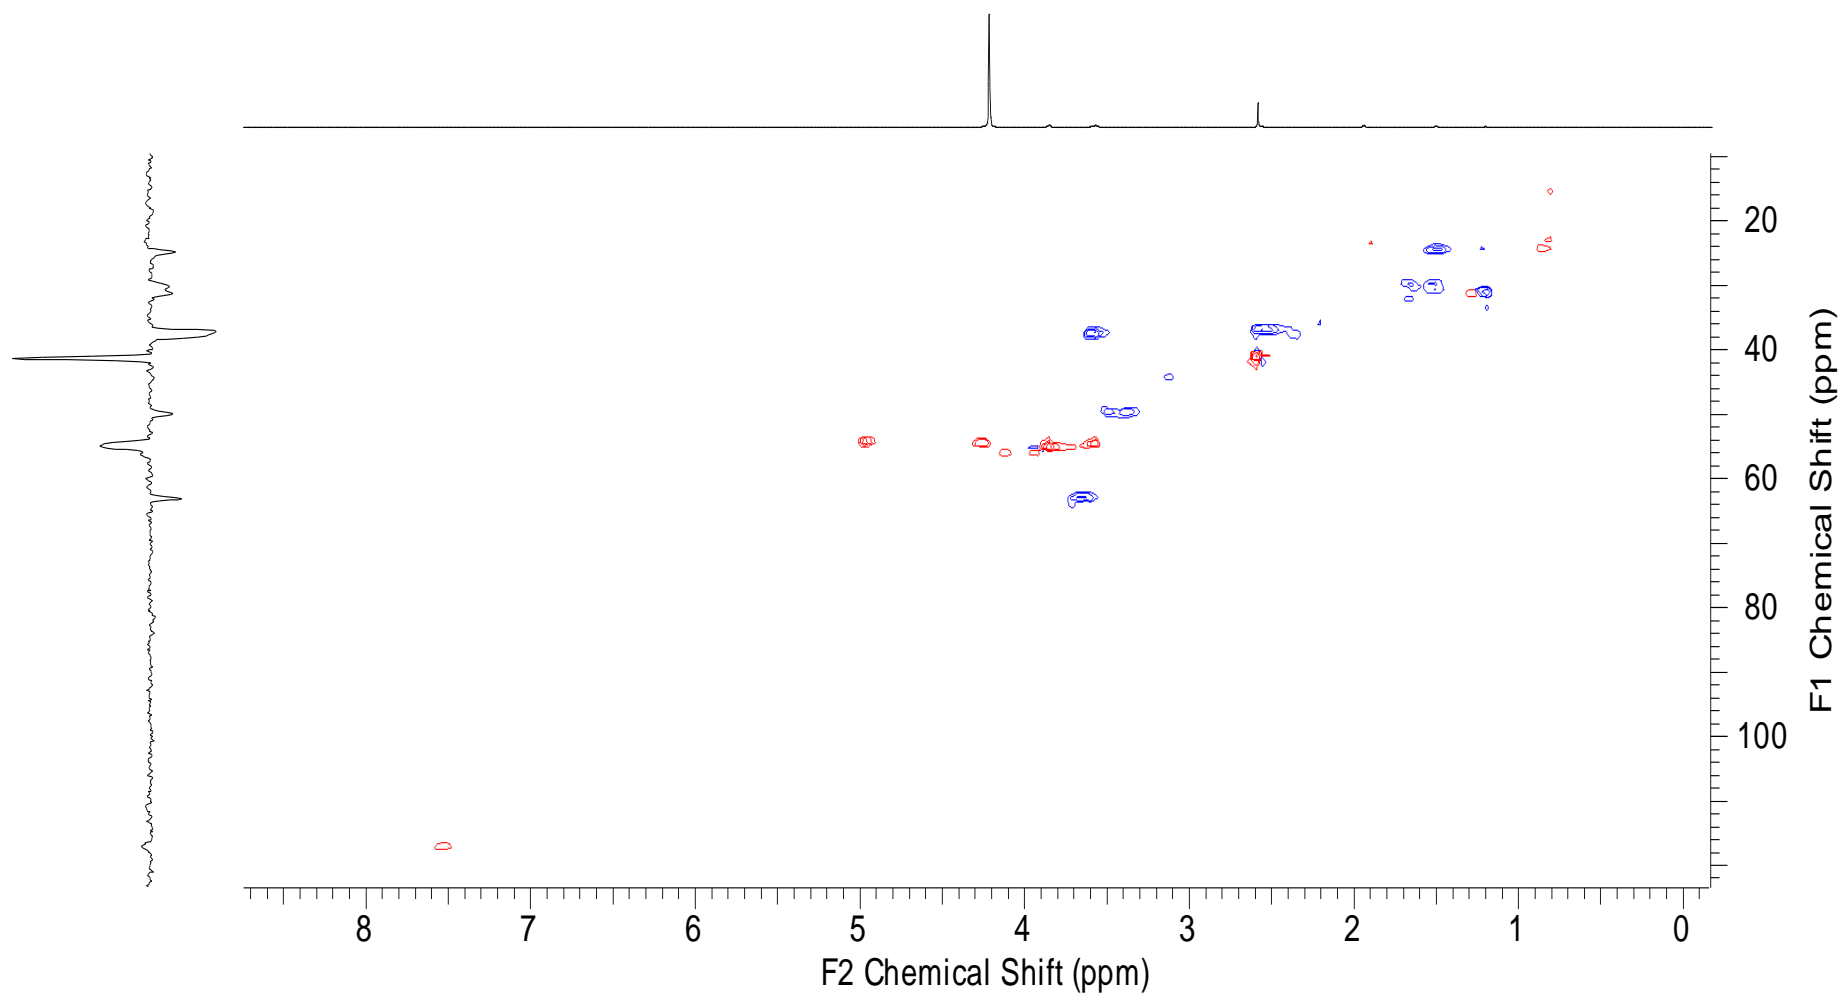

**Figure S19.** HSQC spectrum of compound **2** ( $\text{CD}_3\text{CN}/\text{D}_2\text{O}$  1:1).

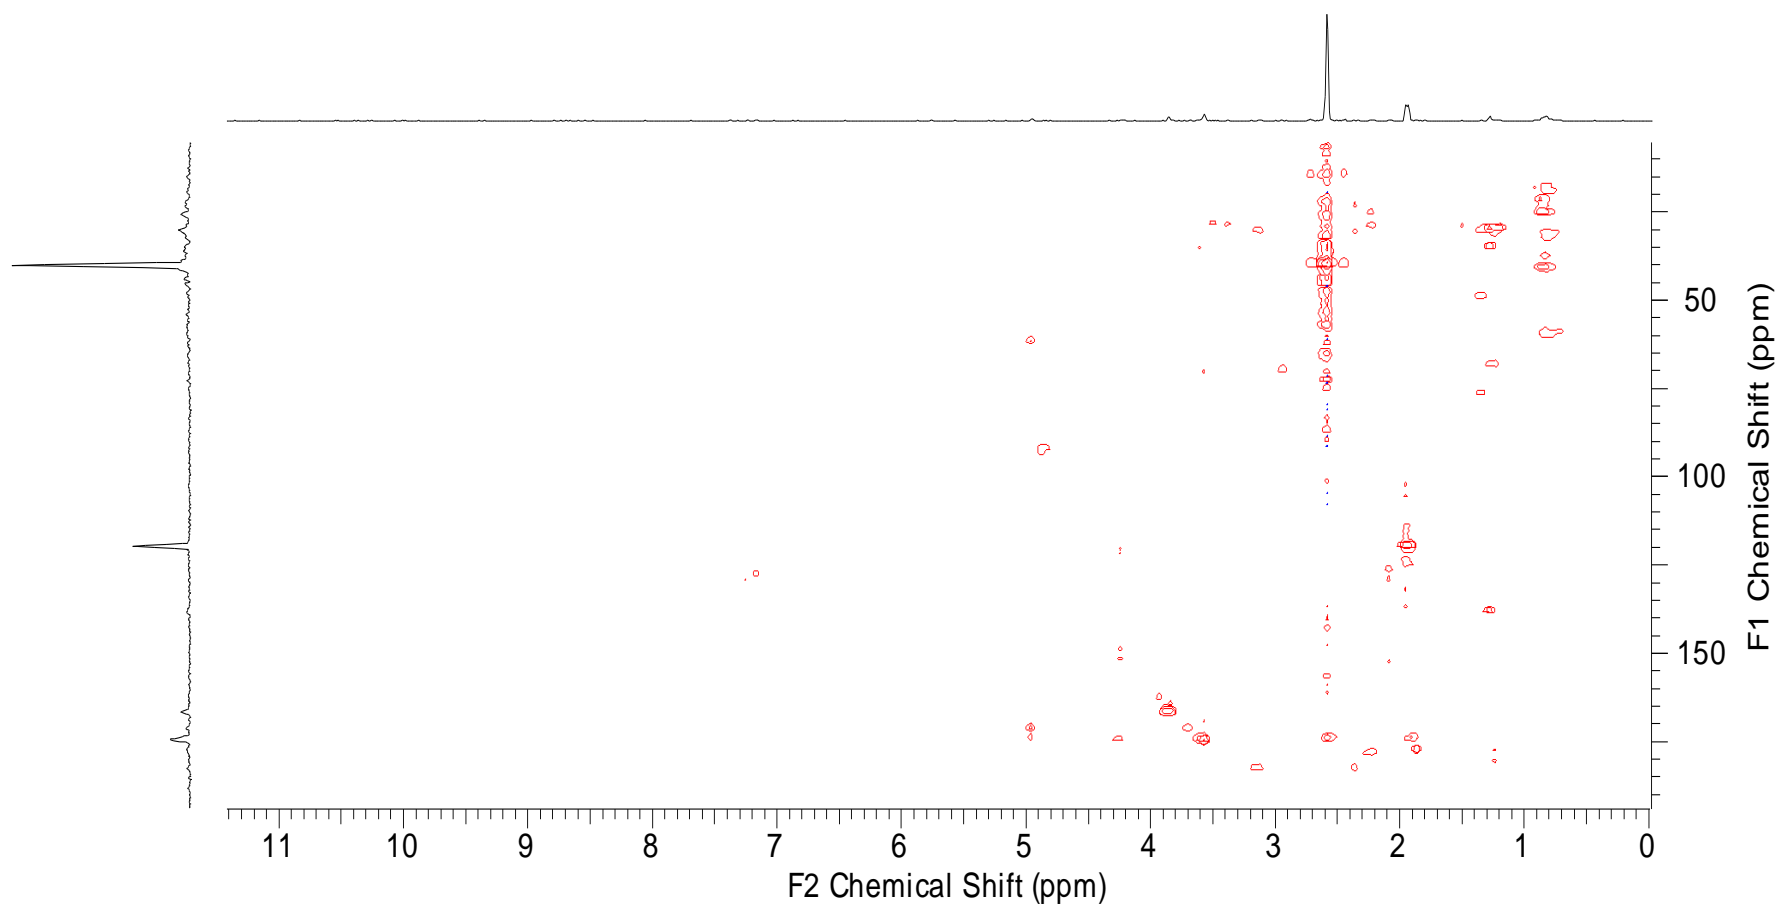

**Figure S20.** HMBC spectrum of compound **2** ( $\text{CD}_3\text{CN}/\text{D}_2\text{O}$  1:1).

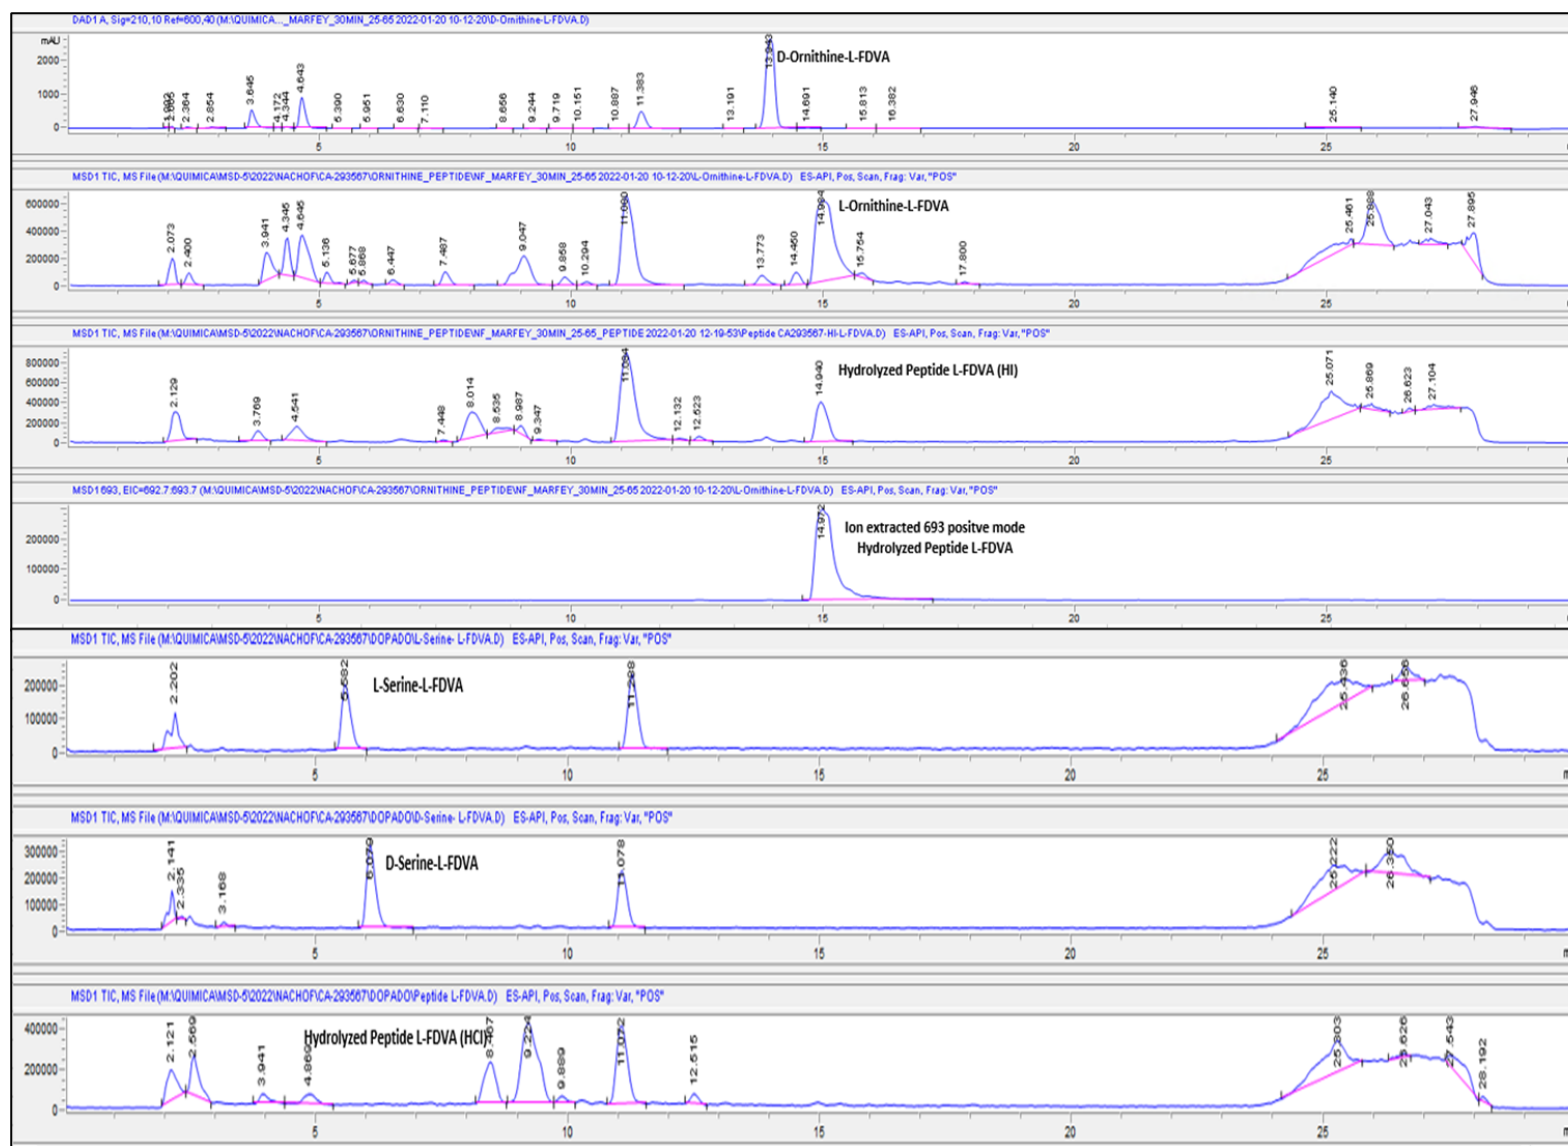

Figure S21. HPLC traces corresponding to Marfey's analysis of **1** (I).

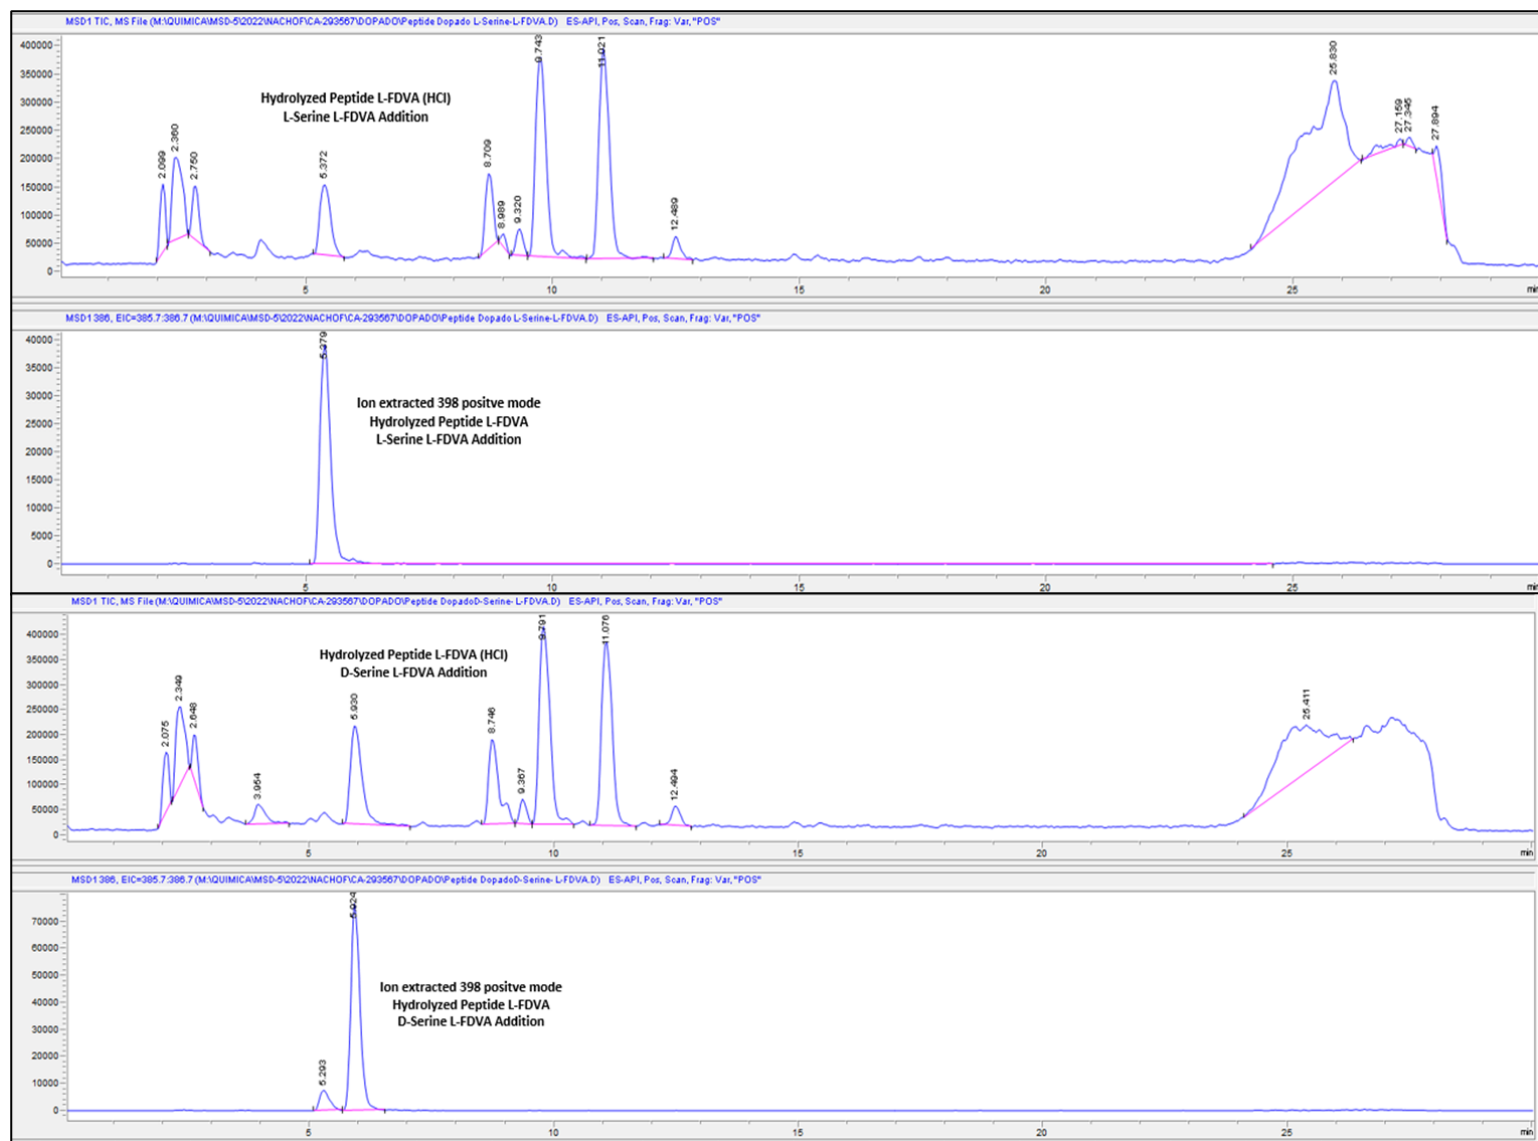

Figure S22. HPLC traces corresponding to Marfey's analysis of 1 (II).
